# Supplementary material
Source: PubMed Central journal article supplement (PMC6929690)
Supplement: NIHMS1036269-supplement-1.pdf [file NIHMS1036269-supplement-1.pdf]

**Figure S1**

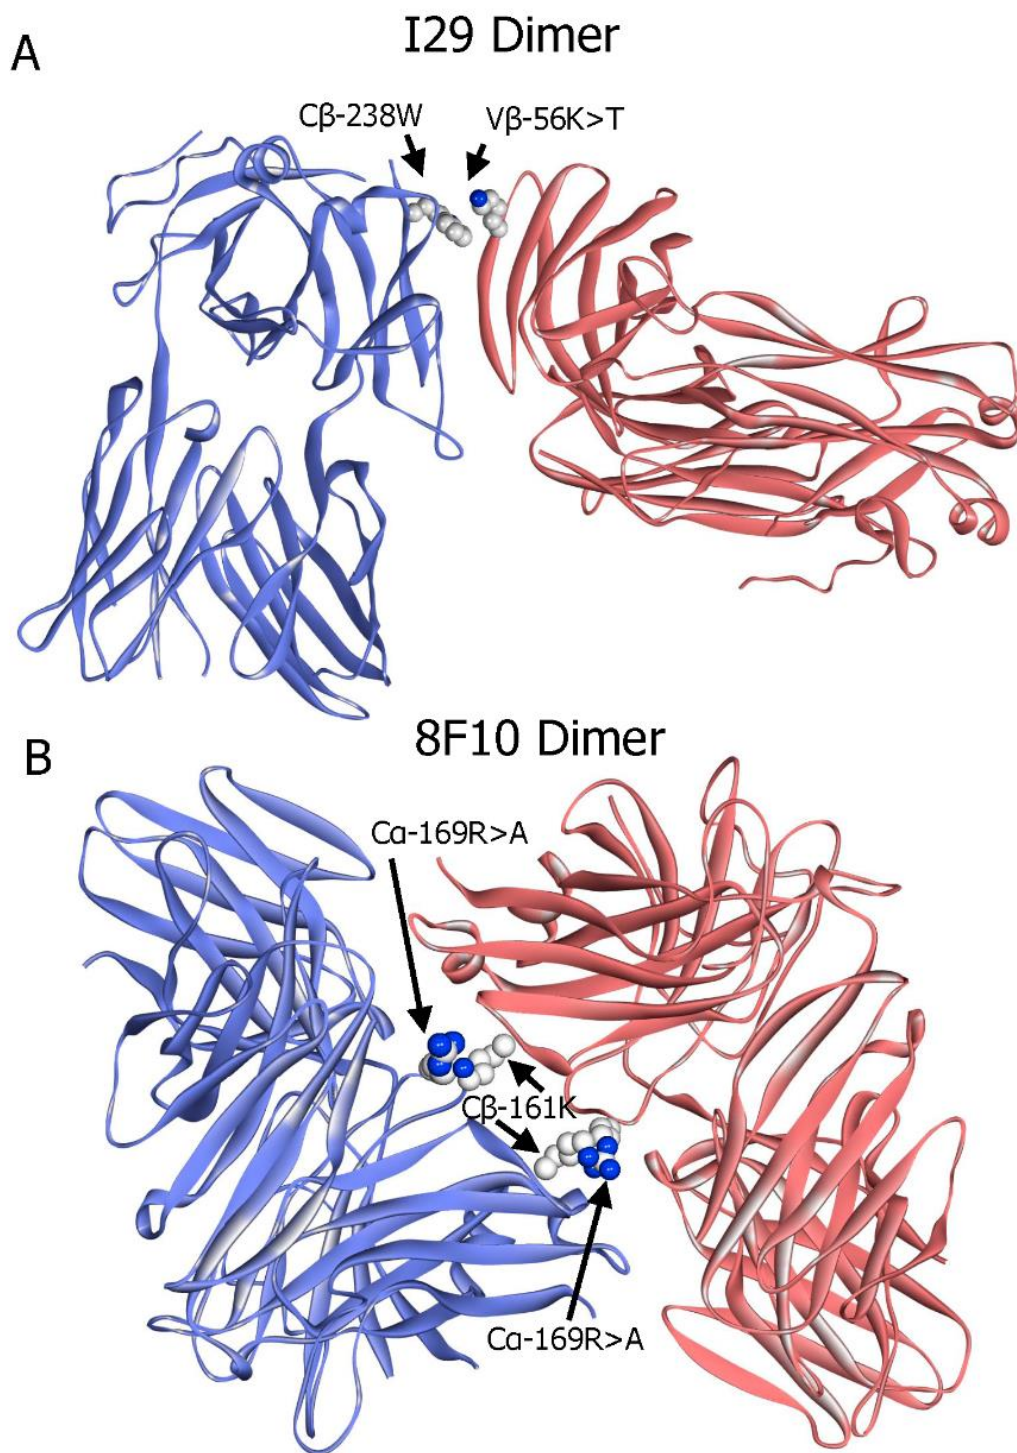

Figure S2

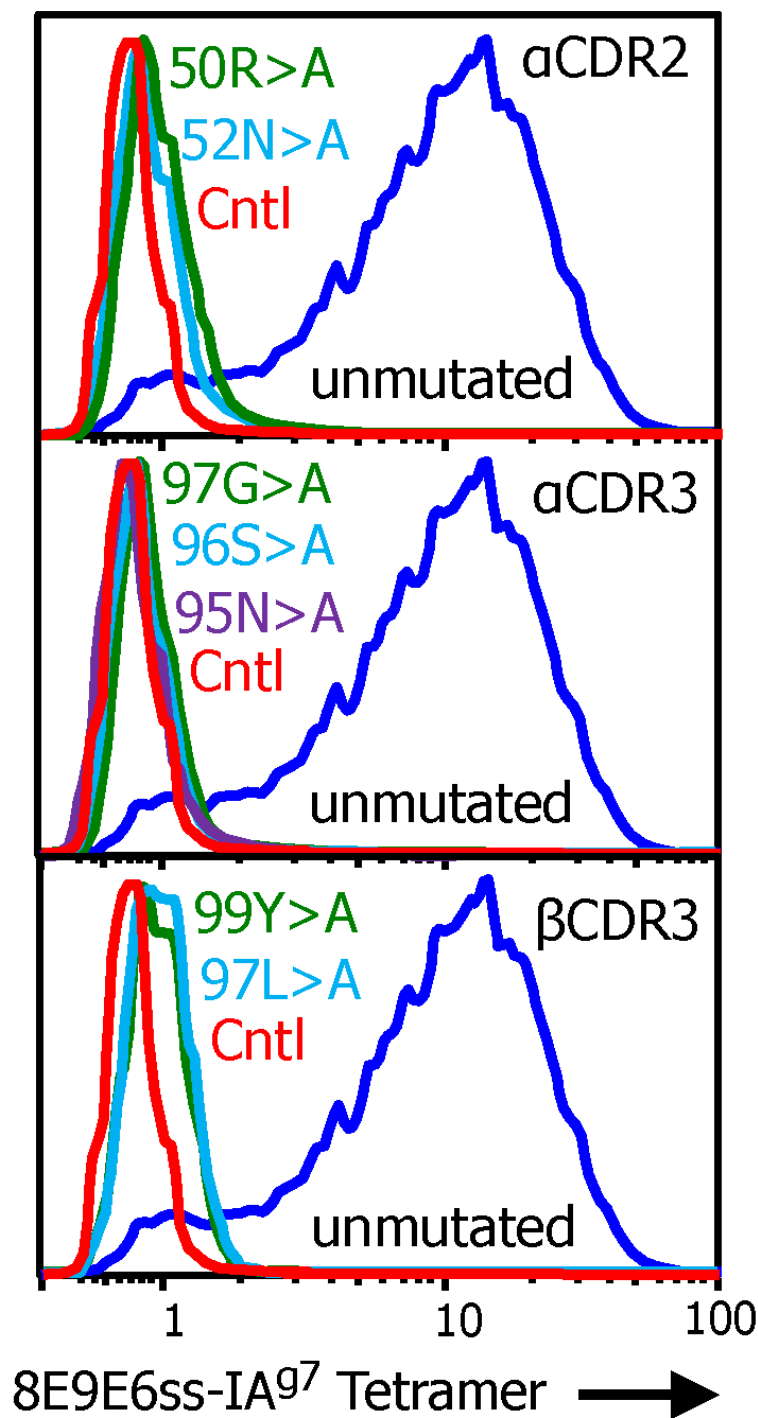

**Fig. S2.** Extension of the mutational analysis of the I.29 TCR shown in Fig. 2b in the main manuscript. Individual mutations to alanine were introduced into I.29 TCR amino acids within V $\alpha$ CDR2, V $\alpha$ CDR3 and V $\beta$ CDR3 making the most contact with the IAg7-8E9E6ss ligand (Table 2). The mutated TCRs were introduced into 5KC to construct avatars expressing the TCR on the surface, which was confirmed by anti-C $\beta$  staining. Each resulting T cell was tested for binding of the IAg7-8E9E6ss fluorescent tetramer. The positive control was the 5KC avatar expressing the unmutated TCR and the negative control was the 5KC recipient, which lacks functional TCR genes.

**Table S1 – Crystallography Statistics**

|                                             | I29 TCR                                       | IA <sup>97</sup><br>8E9E6ss<br>I29 TCR<br>Complex | 8F10 TCR                  | IA <sup>97</sup><br>8G9E<br>8F10 TCR<br>Complex | DQ8<br>8E9E11ss<br>T1D3 TCR<br>Complex |
|---------------------------------------------|-----------------------------------------------|---------------------------------------------------|---------------------------|-------------------------------------------------|----------------------------------------|
| PDB No.                                     | 6DFQ                                          | 6DFS                                              | 6DFV                      | 6DFW                                            | 6DFX                                   |
| Space Group                                 | P2 <sub>1</sub> 2 <sub>1</sub> 2 <sub>1</sub> | P6 <sub>3</sub>                                   | P1                        | P2 <sub>1</sub>                                 | P2 <sub>1</sub>                        |
| <b>Data collection</b>                      |                                               |                                                   |                           |                                                 |                                        |
| Dimensions (Å)                              | a 95.11<br>b 117.63<br>c 234.77               | 269.52                                            | 62.02<br>69.69<br>69.70   | 93.10<br>102.04<br>136.00                       | 111.71<br>88.90<br>116.78              |
| Angles (°) (Å)                              | α 90.00<br>β 90.00<br>γ 90.00                 | 90.00                                             | 111.66<br>111.03<br>94.86 | 90.00<br>107.83<br>90.00                        | 90.00<br>104.26<br>90.00               |
| Resol. Range (Å)                            | 50-2.60                                       | 50-3.10                                           | 50-1.71                   | 50-3.20                                         | 50-2.03                                |
| $R_{\text{sym}}$ or $R_{\text{merge}}^{*†}$ | 0.05(0.73)                                    | 0.03(0.66)                                        | 0.04(0.86)                | 0.07(0.86)                                      | 0.05(0.26)                             |
| $I/\sigma I^*$                              | 12.4(1.2)                                     | 24.4(1.4)                                         | 11.6(1.2)                 | 7.6(1.0)                                        | 14.4(2.1)                              |
| Completeness (%) <sup>*</sup>               | 98.1(99.5)                                    | 99.7(100)                                         | 91.5(91.1)                | 96.9(97.3)                                      | 98.1(88.3)                             |
| Redundancy <sup>*</sup>                     | 3.7 (3.7)                                     | 6.3(6.8)                                          | 4.1(4.1)                  | 3.4(3.4)                                        | 4.5(3.3)                               |
| <b>Refinement</b>                           |                                               |                                                   |                           |                                                 |                                        |
| Resol. Range (Å)                            | 47.6-2.60                                     | 46.73-3.10                                        | 48.21-1.71                | 46.56-3.20                                      | 47.78-2.03                             |
| No. reflections                             | 76175                                         | 32259                                             | 91564                     | 36910                                           | 135207                                 |
| Rwork‡                                      | 22.0                                          | 24.0                                              | 17.1                      | 23.3                                            | 18.1                                   |
| Rfree‡                                      | 25.3                                          | 28.5                                              | 23.1                      | 29.7                                            | 21.7                                   |
| No. atoms                                   | 13644                                         | 6254                                              | 7097                      | 12189                                           | 13693                                  |
| Protein                                     | 13467                                         | 6221                                              | 6770                      | 12189                                           | 12872                                  |
| Ligand/ion                                  | 9                                             | 14                                                | 8                         | N/A                                             | 46                                     |
| Water                                       | 168                                           | 19                                                | 319                       | N/A                                             | 775                                    |
| <u>B-factors</u>                            |                                               |                                                   |                           |                                                 |                                        |
| Protein                                     | 74.98                                         | 69.59                                             | 41.64                     | 132.2                                           | 49.56                                  |
| Ligand/ion                                  | 69.97                                         | 72.10                                             | 45.95                     | N/A                                             | 54.61                                  |
| Water                                       | 52.85                                         | 18.14                                             | 38.65                     | N/A                                             | 46.85                                  |
| <u>R.m.s deviations</u>                     |                                               |                                                   |                           |                                                 |                                        |
| Bond lengths (Å)                            | 0.014                                         | 0.019                                             | 0.015                     | 0.019                                           | 0.019                                  |
| Bond angles (°)                             | 1.746                                         | 1.939                                             | 1.747                     | 1.934                                           | 1.937                                  |

\*All data (outer shell).

†  $R_{\text{merge}} = \sum(|I - \langle I \rangle|) / \sum(I)$ .

‡  $R_{\text{work}}$  or  $R_{\text{free}} = \sum||F_o| - |F_c|| / \sum|F_o|$ ,  $R_{\text{free}}$  is calculated from a set of ~5% of the total reflections randomly chosen and set aside.

Diffraction data collection, indexing and merging, model building and refinement statistics are shown for the 5 structures reported in this paper.

## Supplemental Spreadsheet S1

Contact of I.29 TCR wiith IAg7-8E9E6ss

| TCR<br>V | TCR<br>AA | TCR<br>atom | pMHC<br>Chain | pMHC<br>AA | pMHC<br>atom | dist<br>Å | Hbond<br>salt | VDW    |       | MHC |     |   |
|----------|-----------|-------------|---------------|------------|--------------|-----------|---------------|--------|-------|-----|-----|---|
|          |           |             |               |            |              |           |               | VDWC-C | other | α   | PEP | β |
| Va       | 26D       | OD1         | P             | -1E        | OE1          | 4.48      |               |        | 1     |     |     | 1 |
| Va       | 27T       | CB          | B             | 85E        | OE1          | 4.29      |               |        | 1     |     |     | 1 |
| Va       | 27T       | CG2         | B             | 85E        | OE1          | 4.20      |               |        | 1     |     |     | 1 |
| Va       | 27T       | O           | B             | 81H        | CE1          | 4.39      |               |        | 1     |     |     | 1 |
| Va       | 27T       | O           | B             | 81H        | ND1          | 4.34      |               |        | 1     |     |     | 1 |
| Va       | 27T       | OG1         | B             | 81H        | CE1          | 4.19      |               |        | 1     |     |     | 1 |
| Va       | 27T       | OG1         | B             | 85E        | CD           | 4.38      |               |        | 1     |     |     | 1 |
| Va       | 27T       | OG1         | B             | 85E        | OE1          | 3.37      | 1             |        |       |     |     | 1 |
| Va       | 28A       | CB          | P             | -1E        | OE1          | 4.04      |               |        | 1     |     |     | 1 |
| Va       | 28A       | CB          | P             | 2L         | CD1          | 4.30      |               | 1      |       |     |     | 1 |
| Va       | 28A       | O           | P             | 2L         | CD1          | 4.28      |               |        | 1     |     |     | 1 |
| Va       | 30S       | CB          | B             | 77T        | CB           | 4.23      |               | 1      |       |     |     | 1 |
| Va       | 30S       | CB          | B             | 77T        | CG2          | 4.34      |               | 1      |       |     |     | 1 |
| Va       | 30S       | OG          | B             | 77T        | CB           | 4.12      |               |        | 1     |     |     | 1 |
| Va       | 30S       | OG          | B             | 77T        | CG2          | 4.21      |               |        | 1     |     |     | 1 |
| Va       | 50R       | CD          | B             | 69E        | C            | 4.40      |               | 1      |       |     |     | 1 |
| Va       | 50R       | CD          | B             | 69E        | O            | 4.19      |               |        | 1     |     |     | 1 |
| Va       | 50R       | CD          | B             | 70R        | CA           | 4.34      |               | 1      |       |     |     | 1 |
| Va       | 50R       | CD          | B             | 73A        | CB           | 4.00      |               | 1      |       |     |     | 1 |
| Va       | 50R       | CZ          | B             | 70R        | CA           | 3.79      |               | 1      |       |     |     | 1 |
| Va       | 50R       | CZ          | B             | 70R        | CB           | 4.03      |               | 1      |       |     |     | 1 |
| Va       | 50R       | CZ          | B             | 70R        | N            | 4.14      |               |        | 1     |     |     | 1 |
| Va       | 50R       | NE          | B             | 69E        | C            | 4.21      |               |        | 1     |     |     | 1 |
| Va       | 50R       | NE          | B             | 69E        | CB           | 4.47      |               |        | 1     |     |     | 1 |
| Va       | 50R       | NE          | B             | 69E        | O            | 4.41      |               |        | 1     |     |     | 1 |
| Va       | 50R       | NE          | B             | 70R        | CA           | 4.00      |               |        | 1     |     |     | 1 |
| Va       | 50R       | NE          | B             | 70R        | N            | 4.06      |               |        | 1     |     |     | 1 |
| Va       | 50R       | NH1         | B             | 70R        | CA           | 4.00      |               |        | 1     |     |     | 1 |
| Va       | 50R       | NH1         | B             | 70R        | CB           | 4.08      |               |        | 1     |     |     | 1 |
| Va       | 50R       | NH1         | B             | 70R        | CG           | 4.08      |               |        | 1     |     |     | 1 |
| Va       | 50R       | NH2         | B             | 70R        | CA           | 4.05      |               |        | 1     |     |     | 1 |
| Va       | 50R       | NH2         | B             | 70R        | CB           | 3.94      |               |        | 1     |     |     | 1 |
| Va       | 50R       | NH2         | B             | 70R        | N            | 4.19      |               |        | 1     |     |     | 1 |
| Va       | 52N       | CA          | B             | 76D        | CB           | 4.11      |               | 1      |       |     |     | 1 |
| Va       | 52N       | CA          | B             | 76D        | CG           | 4.19      |               | 1      |       |     |     | 1 |
| Va       | 52N       | CA          | B             | 76D        | OD1          | 3.85      |               |        | 1     |     |     | 1 |
| Va       | 52N       | CB          | B             | 73A        | CA           | 4.42      |               | 1      |       |     |     | 1 |
| Va       | 52N       | CB          | B             | 76D        | CB           | 4.34      |               | 1      |       |     |     | 1 |
| Va       | 52N       | CB          | B             | 76D        | CG           | 4.07      |               | 1      |       |     |     | 1 |
| Va       | 52N       | CB          | B             | 76D        | OD1          | 3.29      |               |        | 1     |     |     | 1 |
| Va       | 52N       | CG          | B             | 73A        | CA           | 4.13      |               | 1      |       |     |     | 1 |

|    |     |     |   |     |     |      |   |   |   |
|----|-----|-----|---|-----|-----|------|---|---|---|
| Va | 52N | CG  | B | 73A | CB  | 3.94 | 1 |   | 1 |
| Va | 52N | ND2 | B | 73A | CA  | 3.83 |   | 1 | 1 |
| Va | 52N | ND2 | B | 73A | CB  | 3.77 |   | 1 | 1 |
| Va | 52N | ND2 | B | 73A | N   | 4.28 |   | 1 | 1 |
| Va | 52N | OD1 | B | 73A | CB  | 4.13 |   | 1 | 1 |
| Va | 94S | O   | P | 5V  | CG2 | 3.65 |   | 1 | 1 |
| Va | 94S | OG  | B | 77T | CG2 | 4.44 |   | 1 | 1 |
| Va | 95N | C   | P | 2L  | CB  | 4.26 | 1 |   | 1 |
| Va | 95N | C   | P | 2L  | CD1 | 4.47 | 1 |   | 1 |
| Va | 95N | C   | P | 2L  | CD2 | 3.72 | 1 |   | 1 |
| Va | 95N | C   | P | 2L  | CG  | 4.36 | 1 |   | 1 |
| Va | 95N | C   | P | 3Y  | CD1 | 3.89 | 1 |   | 1 |
| Va | 95N | C   | P | 3Y  | CE1 | 4.26 | 1 |   | 1 |
| Va | 95N | C   | P | 3Y  | N   | 4.15 |   | 1 | 1 |
| Va | 95N | C   | P | 3Y  | O   | 4.18 |   | 1 | 1 |
| Va | 95N | CA  | P | 3Y  | O   | 3.86 |   | 1 | 1 |
| Va | 95N | CB  | B | 77T | OG1 | 3.97 |   | 1 | 1 |
| Va | 95N | CB  | B | 78A | CB  | 4.27 | 1 |   | 1 |
| Va | 95N | CB  | P | 2L  | CB  | 4.25 | 1 |   | 1 |
| Va | 95N | CB  | P | 2L  | CD1 | 4.34 | 1 |   | 1 |
| Va | 95N | CB  | P | 3Y  | C   | 4.36 | 1 |   | 1 |
| Va | 95N | CB  | P | 3Y  | N   | 4.21 |   | 1 | 1 |
| Va | 95N | CB  | P | 3Y  | O   | 3.54 |   | 1 | 1 |
| Va | 95N | CG  | B | 74E | CG  | 4.13 | 1 |   | 1 |
| Va | 95N | CG  | B | 77T | CB  | 4.27 | 1 |   | 1 |
| Va | 95N | CG  | B | 77T | OG1 | 3.10 |   | 1 | 1 |
| Va | 95N | CG  | B | 78A | CB  | 4.19 | 1 |   | 1 |
| Va | 95N | CG  | P | 3Y  | O   | 3.85 |   | 1 | 1 |
| Va | 95N | CG  | P | 5V  | CG2 | 4.29 | 1 |   | 1 |
| Va | 95N | ND2 | B | 74E | CB  | 4.44 |   | 1 | 1 |
| Va | 95N | ND2 | B | 74E | CD  | 3.66 |   | 1 | 1 |
| Va | 95N | ND2 | B | 74E | CG  | 3.11 |   | 1 | 1 |
| Va | 95N | ND2 | B | 74E | OE2 | 3.73 |   | 1 | 1 |
| Va | 95N | ND2 | B | 77T | OG1 | 3.53 |   | 1 | 1 |
| Va | 95N | ND2 | B | 78A | CB  | 3.89 |   | 1 | 1 |
| Va | 95N | ND2 | P | 3Y  | C   | 4.00 |   | 1 | 1 |
| Va | 95N | ND2 | P | 3Y  | O   | 3.19 | 1 |   | 1 |
| Va | 95N | ND2 | P | 4L  | CA  | 4.06 |   | 1 | 1 |
| Va | 95N | ND2 | P | 4L  | N   | 4.41 |   | 1 | 1 |
| Va | 95N | ND2 | P | 5V  | CG2 | 3.62 |   | 1 | 1 |
| Va | 95N | ND2 | P | 5V  | N   | 4.47 |   | 1 | 1 |
| Va | 95N | O   | P | 2L  | C   | 3.73 |   | 1 | 1 |
| Va | 95N | O   | P | 2L  | CA  | 3.47 |   | 1 | 1 |
| Va | 95N | O   | P | 2L  | CB  | 3.31 |   | 1 | 1 |
| Va | 95N | O   | P | 2L  | CD1 | 4.15 |   | 1 | 1 |
| Va | 95N | O   | P | 2L  | CD2 | 3.14 |   | 1 | 1 |
| Va | 95N | O   | P | 2L  | CG  | 3.67 |   | 1 | 1 |

|    |     |     |   |     |     |      |   |   |   |
|----|-----|-----|---|-----|-----|------|---|---|---|
| Va | 95N | O   | P | 3Y  | C   | 4.32 |   | 1 | 1 |
| Va | 95N | O   | P | 3Y  | CA  | 4.03 |   | 1 | 1 |
| Va | 95N | O   | P | 3Y  | CB  | 4.27 |   | 1 | 1 |
| Va | 95N | O   | P | 3Y  | CD1 | 3.45 |   | 1 | 1 |
| Va | 95N | O   | P | 3Y  | CE1 | 4.20 |   | 1 | 1 |
| Va | 95N | O   | P | 3Y  | CG  | 4.16 |   | 1 | 1 |
| Va | 95N | O   | P | 3Y  | N   | 3.02 | 1 |   | 1 |
| Va | 95N | O   | P | 3Y  | O   | 3.74 |   | 1 | 1 |
| Va | 95N | OD1 | B | 74E | CG  | 4.43 |   | 1 | 1 |
| Va | 95N | OD1 | B | 77T | CB  | 3.72 |   | 1 | 1 |
| Va | 95N | OD1 | B | 77T | CG2 | 4.30 |   | 1 | 1 |
| Va | 95N | OD1 | B | 77T | OG1 | 2.79 | 1 |   | 1 |
| Va | 96S | C   | P | 3Y  | CE1 | 4.22 |   | 1 | 1 |
| Va | 96S | CA  | P | -1E | OE2 | 3.99 |   | 1 | 1 |
| Va | 96S | CA  | P | 2L  | CD2 | 3.80 |   | 1 | 1 |
| Va | 96S | CA  | P | 3Y  | CD1 | 4.47 |   | 1 | 1 |
| Va | 96S | CB  | P | -1E | CD  | 3.86 |   | 1 | 1 |
| Va | 96S | CB  | P | -1E | OE1 | 4.07 |   | 1 | 1 |
| Va | 96S | CB  | P | -1E | OE2 | 3.07 |   | 1 | 1 |
| Va | 96S | CB  | P | 2L  | CD2 | 3.49 |   | 1 | 1 |
| Va | 96S | N   | P | 2L  | CD2 | 3.94 |   | 1 | 1 |
| Va | 96S | N   | P | 3Y  | CD1 | 4.46 |   | 1 | 1 |
| Va | 96S | OG  | A | 55E | CB  | 4.12 |   | 1 | 1 |
| Va | 96S | OG  | A | 55E | CG  | 4.28 |   | 1 | 1 |
| Va | 96S | OG  | P | -1E | CD  | 3.76 |   | 1 | 1 |
| Va | 96S | OG  | P | -1E | OE1 | 3.95 |   | 1 | 1 |
| Va | 96S | OG  | P | -1E | OE2 | 2.81 | 1 |   | 1 |
| Va | 97G | C   | A | 57Q | C   | 4.40 |   | 1 | 1 |
| Va | 97G | C   | A | 57Q | CB  | 4.05 |   | 1 | 1 |
| Va | 97G | C   | A | 57Q | CG  | 4.19 |   | 1 | 1 |
| Va | 97G | C   | A | 58G | N   | 4.24 |   | 1 | 1 |
| Va | 97G | CA  | A | 57Q | C   | 4.30 |   | 1 | 1 |
| Va | 97G | CA  | A | 58G | CA  | 3.84 |   | 1 | 1 |
| Va | 97G | CA  | A | 58G | N   | 3.76 |   | 1 | 1 |
| Va | 97G | CA  | P | 3Y  | CD1 | 4.26 |   | 1 | 1 |
| Va | 97G | CA  | P | 3Y  | CE1 | 3.57 |   | 1 | 1 |
| Va | 97G | CA  | P | 3Y  | CZ  | 4.48 |   | 1 | 1 |
| Va | 97G | N   | A | 55E | CB  | 4.48 |   | 1 | 1 |
| Va | 97G | N   | P | 3Y  | CD1 | 3.96 |   | 1 | 1 |
| Va | 97G | N   | P | 3Y  | CE1 | 3.67 |   | 1 | 1 |
| Va | 97G | O   | A | 57Q | C   | 4.21 |   | 1 | 1 |
| Va | 97G | O   | A | 57Q | CB  | 3.60 |   | 1 | 1 |
| Va | 97G | O   | A | 57Q | CG  | 3.34 |   | 1 | 1 |
| Va | 97G | O   | A | 57Q | O   | 4.36 |   | 1 | 1 |
| Va | 97G | O   | A | 58G | N   | 4.40 |   | 1 | 1 |
| Va | 98G | CA  | A | 55E | CB  | 4.45 |   | 1 | 1 |
| Va | 98G | CA  | A | 55E | CD  | 4.43 |   | 1 | 1 |

|    |      |     |   |     |     |      |   |   |   |
|----|------|-----|---|-----|-----|------|---|---|---|
| Va | 98G  | CA  | A | 55E | OE2 | 4.12 |   | 1 | 1 |
| Va | 98G  | N   | A | 55E | CB  | 3.97 |   | 1 | 1 |
| Va | 98G  | N   | A | 57Q | CB  | 4.48 |   | 1 | 1 |
| Va | 100N | CG  | P | 3Y  | CE1 | 4.38 |   | 1 | 1 |
| Va | 100N | CG  | P | 3Y  | OH  | 4.21 |   | 1 | 1 |
| Va | 100N | ND2 | P | 3Y  | CE1 | 3.50 |   | 1 | 1 |
| Va | 100N | ND2 | P | 3Y  | CZ  | 3.71 |   | 1 | 1 |
| Va | 100N | ND2 | P | 3Y  | OH  | 3.11 | 1 |   | 1 |
| Va | 100N | OD1 | P | 3Y  | CE1 | 4.41 |   | 1 | 1 |
| Vb | 29Q  | C   | B | 64Q | OE1 | 4.29 |   | 1 | 1 |
| Vb | 29Q  | CA  | B | 64Q | OE1 | 4.15 |   | 1 | 1 |
| Vb | 29Q  | CB  | B | 64Q | OE1 | 4.09 |   | 1 | 1 |
| Vb | 29Q  | CD  | B | 63K | NZ  | 4.18 |   | 1 | 1 |
| Vb | 29Q  | CD  | B | 64Q | OE1 | 3.97 |   | 1 | 1 |
| Vb | 29Q  | CG  | B | 63K | NZ  | 4.42 |   | 1 | 1 |
| Vb | 29Q  | CG  | B | 64Q | OE1 | 4.35 |   | 1 | 1 |
| Vb | 29Q  | NE2 | B | 60Y | CE2 | 3.56 |   | 1 | 1 |
| Vb | 29Q  | NE2 | B | 60Y | CZ  | 4.13 |   | 1 | 1 |
| Vb | 29Q  | NE2 | B | 60Y | OH  | 3.89 |   | 1 | 1 |
| Vb | 29Q  | NE2 | B | 63K | CE  | 4.24 |   | 1 | 1 |
| Vb | 29Q  | NE2 | B | 63K | NZ  | 3.25 | 1 |   | 1 |
| Vb | 29Q  | NE2 | B | 64Q | CD  | 4.08 |   | 1 | 1 |
| Vb | 29Q  | NE2 | B | 64Q | OE1 | 3.04 | 1 |   | 1 |
| Vb | 29Q  | O   | B | 64Q | CD  | 4.33 |   | 1 | 1 |
| Vb | 29Q  | O   | B | 64Q | NE2 | 4.37 |   | 1 | 1 |
| Vb | 29Q  | O   | B | 64Q | OE1 | 3.54 |   | 1 | 1 |
| Vb | 51R  | CZ  | P | 8E  | OE2 | 3.67 |   | 1 | 1 |
| Vb | 51R  | NE  | P | 8E  | OE2 | 3.93 | 1 |   | 1 |
| Vb | 51R  | NH2 | P | 8E  | CD  | 3.52 |   | 1 | 1 |
| Vb | 51R  | NH2 | P | 8E  | OE1 | 3.74 | 1 |   | 1 |
| Vb | 51R  | NH2 | P | 8E  | OE2 | 2.62 | 1 |   | 1 |
| Vb | 95A  | CB  | B | 64Q | NE2 | 4.21 |   | 1 | 1 |
| Vb | 95A  | O   | B | 64Q | NE2 | 3.74 |   | 1 | 1 |
| Vb | 97L  | C   | B | 70R | NE  | 4.29 |   | 1 | 1 |
| Vb | 97L  | CD1 | A | 61Q | CD  | 4.07 | 1 |   | 1 |
| Vb | 97L  | CD1 | A | 61Q | CG  | 4.08 | 1 |   | 1 |
| Vb | 97L  | CD1 | A | 61Q | OE1 | 4.12 |   | 1 | 1 |
| Vb | 97L  | CD1 | P | 3Y  | OH  | 4.16 |   | 1 | 1 |
| Vb | 97L  | CD1 | P | 5V  | CG1 | 4.27 | 1 |   | 1 |
| Vb | 97L  | O   | B | 70R | CD  | 4.03 |   | 1 | 1 |
| Vb | 97L  | O   | B | 70R | CG  | 3.93 |   | 1 | 1 |
| Vb | 97L  | O   | B | 70R | CZ  | 3.96 |   | 1 | 1 |
| Vb | 97L  | O   | B | 70R | NE  | 3.15 | 1 |   | 1 |
| Vb | 97L  | O   | B | 70R | NH2 | 3.88 |   | 1 | 1 |
| Vb | 98G  | CA  | B | 70R | CG  | 4.35 |   | 1 | 1 |
| Vb | 99Y  | CD1 | B | 64Q | O   | 4.44 |   | 1 | 1 |

|    |     |     |   |     |    |      |    |    |     |    |    |     |
|----|-----|-----|---|-----|----|------|----|----|-----|----|----|-----|
| Vb | 99Y | CD1 | B | 70R | CB | 4.16 |    | 1  |     |    | 1  |     |
| Vb | 99Y | CE1 | B | 64Q | O  | 3.76 |    |    | 1   |    | 1  |     |
| Vb | 99Y | CE1 | B | 70R | CA | 4.29 |    | 1  |     |    | 1  |     |
| Vb | 99Y | CE1 | B | 70R | CB | 3.17 |    | 1  |     |    | 1  |     |
| Vb | 99Y | CE1 | B | 70R | CG | 4.05 |    | 1  |     |    | 1  |     |
| Vb | 99Y | CE1 | B | 70R | N  | 4.32 |    |    | 1   |    | 1  |     |
| Vb | 99Y | CE1 | B | 70R | NE | 4.31 |    |    | 1   |    | 1  |     |
| Vb | 99Y | CE2 | B | 64Q | O  | 4.12 |    |    | 1   |    | 1  |     |
| Vb | 99Y | CZ  | B | 64Q | C  | 4.41 |    | 1  |     |    | 1  |     |
| Vb | 99Y | CZ  | B | 64Q | O  | 3.59 |    |    | 1   |    | 1  |     |
| Vb | 99Y | CZ  | B | 67Y | C  | 4.45 |    | 1  |     |    | 1  |     |
| Vb | 99Y | CZ  | B | 67Y | CA | 4.37 |    | 1  |     |    | 1  |     |
| Vb | 99Y | CZ  | B | 70R | CA | 4.32 |    | 1  |     |    | 1  |     |
| Vb | 99Y | CZ  | B | 70R | CB | 3.62 |    | 1  |     |    | 1  |     |
| Vb | 99Y | CZ  | B | 70R | N  | 3.89 |    |    | 1   |    | 1  |     |
| Vb | 99Y | OH  | B | 64Q | C  | 4.11 |    |    | 1   |    | 1  |     |
| Vb | 99Y | OH  | B | 64Q | O  | 3.61 |    |    | 1   |    | 1  |     |
| Vb | 99Y | OH  | B | 67Y | C  | 3.32 |    |    | 1   |    | 1  |     |
| Vb | 99Y | OH  | B | 67Y | CA | 3.61 |    |    | 1   |    | 1  |     |
| Vb | 99Y | OH  | B | 67Y | N  | 4.08 |    |    | 1   |    | 1  |     |
| Vb | 99Y | OH  | B | 67Y | O  | 3.63 |    |    | 1   |    | 1  |     |
| Vb | 99Y | OH  | B | 68L | C  | 4.19 |    |    | 1   |    | 1  |     |
| Vb | 99Y | OH  | B | 68L | CA | 4.44 |    |    | 1   |    | 1  |     |
| Vb | 99Y | OH  | B | 68L | N  | 3.47 | 1  |    |     |    | 1  |     |
| Vb | 99Y | OH  | B | 69E | C  | 4.02 |    |    | 1   |    | 1  |     |
| Vb | 99Y | OH  | B | 69E | CA | 4.12 |    |    | 1   |    | 1  |     |
| Vb | 99Y | OH  | B | 69E | CB | 4.38 |    |    | 1   |    | 1  |     |
| Vb | 99Y | OH  | B | 69E | N  | 3.46 | 1  |    |     |    | 1  |     |
| Vb | 99Y | OH  | B | 70R | CA | 3.71 |    |    | 1   |    | 1  |     |
| Vb | 99Y | OH  | B | 70R | CB | 3.34 |    |    | 1   |    | 1  |     |
| Vb | 99Y | OH  | B | 70R | N  | 2.98 |    | 1  |     |    | 1  |     |
|    |     |     |   |     |    |      | 15 | 58 | 139 | 23 | 72 | 117 |
|    |     |     |   |     |    |      |    |    | 212 |    |    | 212 |



Contact of IAg7-8E9E6ss with I.29 TCR

| pMHC Chain | pMHC AA | pMHC atom | TCR V | TCR AA | TCR atom | dist Å | Hbond salt | VDWC-C | VDW other | MHC $\alpha$ | PEP | MHC $\beta$ |
|------------|---------|-----------|-------|--------|----------|--------|------------|--------|-----------|--------------|-----|-------------|
| A          | 55E     | CB        | Va    | 96S    | OG       | 4.12   |            |        | 1         | 1            |     |             |
| A          | 55E     | CB        | Va    | 97G    | N        | 4.48   |            |        | 1         | 1            |     |             |
| A          | 55E     | CB        | Va    | 98G    | N        | 3.97   |            |        | 1         | 1            |     |             |
| A          | 55E     | CB        | Va    | 98G    | CA       | 4.45   |            | 1      |           | 1            |     |             |
| A          | 55E     | CG        | Va    | 96S    | OG       | 4.28   |            |        | 1         | 1            |     |             |
| A          | 55E     | CD        | Va    | 98G    | CA       | 4.43   |            | 1      |           | 1            |     |             |
| A          | 55E     | OE2       | Va    | 98G    | CA       | 4.12   |            |        | 1         | 1            |     |             |
| A          | 57Q     | C         | Va    | 97G    | CA       | 4.30   |            | 1      |           | 1            |     |             |
| A          | 57Q     | C         | Va    | 97G    | C        | 4.40   |            | 1      |           | 1            |     |             |
| A          | 57Q     | C         | Va    | 97G    | O        | 4.21   |            |        | 1         | 1            |     |             |
| A          | 57Q     | O         | Va    | 97G    | O        | 4.36   |            |        | 1         | 1            |     |             |
| A          | 57Q     | CB        | Va    | 97G    | C        | 4.05   |            | 1      |           | 1            |     |             |
| A          | 57Q     | CB        | Va    | 97G    | O        | 3.60   |            |        | 1         | 1            |     |             |
| A          | 57Q     | CB        | Va    | 98G    | N        | 4.48   |            |        | 1         | 1            |     |             |
| A          | 57Q     | CG        | Va    | 97G    | C        | 4.19   |            | 1      |           | 1            |     |             |
| A          | 57Q     | CG        | Va    | 97G    | O        | 3.34   |            |        | 1         | 1            |     |             |
| A          | 58G     | N         | Va    | 97G    | CA       | 3.76   |            |        | 1         | 1            |     |             |
| A          | 58G     | N         | Va    | 97G    | C        | 4.24   |            |        | 1         | 1            |     |             |
| A          | 58G     | N         | Va    | 97G    | O        | 4.40   |            |        | 1         | 1            |     |             |
| A          | 58G     | CA        | Va    | 97G    | CA       | 3.84   |            | 1      |           | 1            |     |             |
| A          | 61Q     | CG        | Vb    | 97L    | CD1      | 4.08   |            | 1      |           | 1            |     |             |
| A          | 61Q     | CD        | Vb    | 97L    | CD1      | 4.07   |            | 1      |           | 1            |     |             |
| A          | 61Q     | OE1       | Vb    | 97L    | CD1      | 4.12   |            |        | 1         | 1            |     |             |
| B          | 60Y     | CE2       | Vb    | 29Q    | NE2      | 3.56   |            |        | 1         |              |     | 1           |
| B          | 60Y     | CZ        | Vb    | 29Q    | NE2      | 4.13   |            |        | 1         |              |     | 1           |
| B          | 60Y     | OH        | Vb    | 29Q    | NE2      | 3.89   |            |        | 1         |              |     | 1           |
| B          | 63K     | CE        | Vb    | 29Q    | NE2      | 4.24   |            |        | 1         |              |     | 1           |
| B          | 63K     | NZ        | Vb    | 29Q    | CG       | 4.42   |            |        | 1         |              |     | 1           |
| B          | 63K     | NZ        | Vb    | 29Q    | CD       | 4.18   |            |        | 1         |              |     | 1           |
| B          | 63K     | NZ        | Vb    | 29Q    | NE2      | 3.25   | 1          |        |           |              |     | 1           |
| B          | 64Q     | C         | Vb    | 99Y    | CZ       | 4.41   |            | 1      |           |              |     | 1           |
| B          | 64Q     | C         | Vb    | 99Y    | OH       | 4.11   |            |        | 1         |              |     | 1           |
| B          | 64Q     | O         | Vb    | 99Y    | CE2      | 4.12   |            |        | 1         |              |     | 1           |
| B          | 64Q     | O         | Vb    | 99Y    | CD1      | 4.44   |            |        | 1         |              |     | 1           |
| B          | 64Q     | O         | Vb    | 99Y    | CE1      | 3.76   |            |        | 1         |              |     | 1           |
| B          | 64Q     | O         | Vb    | 99Y    | CZ       | 3.59   |            |        | 1         |              |     | 1           |
| B          | 64Q     | O         | Vb    | 99Y    | OH       | 3.61   |            |        | 1         |              |     | 1           |
| B          | 64Q     | CD        | Vb    | 29Q    | O        | 4.33   |            |        | 1         |              |     | 1           |
| B          | 64Q     | CD        | Vb    | 29Q    | NE2      | 4.08   |            |        | 1         |              |     | 1           |
| B          | 64Q     | OE1       | Vb    | 29Q    | CA       | 4.15   |            |        | 1         |              |     | 1           |
| B          | 64Q     | OE1       | Vb    | 29Q    | C        | 4.29   |            |        | 1         |              |     | 1           |
| B          | 64Q     | OE1       | Vb    | 29Q    | CB       | 4.09   |            |        | 1         |              |     | 1           |

|   |     |     |    |     |     |      |   |   |   |
|---|-----|-----|----|-----|-----|------|---|---|---|
| B | 64Q | OE1 | Vb | 29Q | CG  | 4.35 |   | 1 | 1 |
| B | 64Q | OE1 | Vb | 29Q | CD  | 3.97 |   | 1 | 1 |
| B | 64Q | OE1 | Vb | 29Q | O   | 3.54 |   | 1 | 1 |
| B | 64Q | OE1 | Vb | 29Q | NE2 | 3.04 | 1 |   | 1 |
| B | 64Q | NE2 | Vb | 29Q | O   | 4.37 |   | 1 | 1 |
| B | 64Q | NE2 | Vb | 95A | O   | 3.74 |   | 1 | 1 |
| B | 64Q | NE2 | Vb | 95A | CB  | 4.21 |   | 1 | 1 |
| B | 67Y | N   | Vb | 99Y | OH  | 4.08 |   | 1 | 1 |
| B | 67Y | CA  | Vb | 99Y | CZ  | 4.37 | 1 |   | 1 |
| B | 67Y | CA  | Vb | 99Y | OH  | 3.61 |   | 1 | 1 |
| B | 67Y | C   | Vb | 99Y | CZ  | 4.45 | 1 |   | 1 |
| B | 67Y | C   | Vb | 99Y | OH  | 3.32 |   | 1 | 1 |
| B | 67Y | O   | Vb | 99Y | OH  | 3.63 |   | 1 | 1 |
| B | 68L | N   | Vb | 99Y | OH  | 3.47 | 1 |   | 1 |
| B | 68L | CA  | Vb | 99Y | OH  | 4.44 |   | 1 | 1 |
| B | 68L | C   | Vb | 99Y | OH  | 4.19 |   | 1 | 1 |
| B | 69E | N   | Vb | 99Y | OH  | 3.46 | 1 |   | 1 |
| B | 69E | CA  | Vb | 99Y | OH  | 4.12 |   | 1 | 1 |
| B | 69E | C   | Vb | 99Y | OH  | 4.02 |   | 1 | 1 |
| B | 69E | C   | Va | 50R | CD  | 4.40 | 1 |   | 1 |
| B | 69E | C   | Va | 50R | NE  | 4.21 |   | 1 | 1 |
| B | 69E | O   | Va | 50R | CD  | 4.19 |   | 1 | 1 |
| B | 69E | O   | Va | 50R | NE  | 4.41 |   | 1 | 1 |
| B | 69E | CB  | Vb | 99Y | OH  | 4.38 |   | 1 | 1 |
| B | 69E | CB  | Va | 50R | NE  | 4.47 |   | 1 | 1 |
| B | 70R | N   | Va | 50R | NH2 | 4.19 |   | 1 | 1 |
| B | 70R | N   | Vb | 99Y | CE1 | 4.32 |   | 1 | 1 |
| B | 70R | N   | Vb | 99Y | CZ  | 3.89 |   | 1 | 1 |
| B | 70R | N   | Vb | 99Y | OH  | 2.98 | 1 |   | 1 |
| B | 70R | N   | Va | 50R | NE  | 4.06 |   | 1 | 1 |
| B | 70R | N   | Va | 50R | CZ  | 4.14 |   | 1 | 1 |
| B | 70R | CA  | Va | 50R | NH2 | 4.05 |   | 1 | 1 |
| B | 70R | CA  | Vb | 99Y | CE1 | 4.29 | 1 |   | 1 |
| B | 70R | CA  | Vb | 99Y | CZ  | 4.32 | 1 |   | 1 |
| B | 70R | CA  | Vb | 99Y | OH  | 3.71 |   | 1 | 1 |
| B | 70R | CA  | Va | 50R | CD  | 4.34 | 1 |   | 1 |
| B | 70R | CA  | Va | 50R | NE  | 4.00 |   | 1 | 1 |
| B | 70R | CA  | Va | 50R | CZ  | 3.79 | 1 |   | 1 |
| B | 70R | CA  | Va | 50R | NH1 | 4.00 |   | 1 | 1 |
| B | 70R | CB  | Va | 50R | NH2 | 3.94 |   | 1 | 1 |
| B | 70R | CB  | Vb | 99Y | CD1 | 4.16 | 1 |   | 1 |
| B | 70R | CB  | Vb | 99Y | CE1 | 3.17 | 1 |   | 1 |
| B | 70R | CB  | Vb | 99Y | CZ  | 3.62 | 1 |   | 1 |
| B | 70R | CB  | Vb | 99Y | OH  | 3.34 |   | 1 | 1 |
| B | 70R | CB  | Va | 50R | CZ  | 4.03 | 1 |   | 1 |
| B | 70R | CB  | Va | 50R | NH1 | 4.08 |   | 1 | 1 |
| B | 70R | CG  | Vb | 98G | CA  | 4.35 | 1 |   | 1 |

|   |     |     |    |     |     |      |  |   |   |   |
|---|-----|-----|----|-----|-----|------|--|---|---|---|
| B | 70R | CG  | Vb | 97L | O   | 3.93 |  |   | 1 | 1 |
| B | 70R | CG  | Vb | 99Y | CE1 | 4.05 |  | 1 |   | 1 |
| B | 70R | CG  | Va | 50R | NH1 | 4.08 |  |   | 1 | 1 |
| B | 70R | CD  | Vb | 97L | O   | 4.03 |  |   | 1 | 1 |
| B | 70R | NE  | Vb | 97L | C   | 4.29 |  |   | 1 | 1 |
| B | 70R | NE  | Vb | 97L | O   | 3.15 |  | 1 |   | 1 |
| B | 70R | NE  | Vb | 99Y | CE1 | 4.31 |  |   | 1 | 1 |
| B | 70R | CZ  | Vb | 97L | O   | 3.96 |  |   | 1 | 1 |
| B | 70R | NH2 | Vb | 97L | O   | 3.88 |  |   | 1 | 1 |
| B | 73A | N   | Va | 52N | ND2 | 4.28 |  |   | 1 | 1 |
| B | 73A | CA  | Va | 52N | CB  | 4.42 |  | 1 |   | 1 |
| B | 73A | CA  | Va | 52N | CG  | 4.13 |  | 1 |   | 1 |
| B | 73A | CA  | Va | 52N | ND2 | 3.83 |  |   | 1 | 1 |
| B | 73A | CB  | Va | 50R | CD  | 4.00 |  | 1 |   | 1 |
| B | 73A | CB  | Va | 52N | OD1 | 4.13 |  |   | 1 | 1 |
| B | 73A | CB  | Va | 52N | CG  | 3.94 |  | 1 |   | 1 |
| B | 73A | CB  | Va | 52N | ND2 | 3.77 |  |   | 1 | 1 |
| B | 74E | CB  | Va | 95N | ND2 | 4.44 |  |   | 1 | 1 |
| B | 74E | CG  | Va | 95N | OD1 | 4.43 |  |   | 1 | 1 |
| B | 74E | CG  | Va | 95N | CG  | 4.13 |  | 1 |   | 1 |
| B | 74E | CG  | Va | 95N | ND2 | 3.11 |  |   | 1 | 1 |
| B | 74E | CD  | Va | 95N | ND2 | 3.66 |  |   | 1 | 1 |
| B | 74E | OE2 | Va | 95N | ND2 | 3.73 |  |   | 1 | 1 |
| B | 76D | CB  | Va | 52N | CA  | 4.11 |  | 1 |   | 1 |
| B | 76D | CB  | Va | 52N | CB  | 4.34 |  | 1 |   | 1 |
| B | 76D | CG  | Va | 52N | CA  | 4.19 |  | 1 |   | 1 |
| B | 76D | CG  | Va | 52N | CB  | 4.07 |  | 1 |   | 1 |
| B | 76D | OD1 | Va | 52N | CA  | 3.85 |  |   | 1 | 1 |
| B | 76D | OD1 | Va | 52N | CB  | 3.29 |  |   | 1 | 1 |
| B | 77T | CB  | Va | 30S | OG  | 4.12 |  |   | 1 | 1 |
| B | 77T | CB  | Va | 95N | OD1 | 3.72 |  |   | 1 | 1 |
| B | 77T | CB  | Va | 30S | CB  | 4.23 |  | 1 |   | 1 |
| B | 77T | CB  | Va | 95N | CG  | 4.27 |  | 1 |   | 1 |
| B | 77T | OG1 | Va | 95N | OD1 | 2.79 |  | 1 |   | 1 |
| B | 77T | OG1 | Va | 95N | CB  | 3.97 |  |   | 1 | 1 |
| B | 77T | OG1 | Va | 95N | CG  | 3.10 |  |   | 1 | 1 |
| B | 77T | OG1 | Va | 95N | ND2 | 3.53 |  |   | 1 | 1 |
| B | 77T | CG2 | Va | 30S | OG  | 4.21 |  |   | 1 | 1 |
| B | 77T | CG2 | Va | 94S | OG  | 4.44 |  |   | 1 | 1 |
| B | 77T | CG2 | Va | 95N | OD1 | 4.30 |  |   | 1 | 1 |
| B | 77T | CG2 | Va | 30S | CB  | 4.34 |  | 1 |   | 1 |
| B | 78A | CB  | Va | 95N | CB  | 4.27 |  | 1 |   | 1 |
| B | 78A | CB  | Va | 95N | CG  | 4.19 |  | 1 |   | 1 |
| B | 78A | CB  | Va | 95N | ND2 | 3.89 |  |   | 1 | 1 |
| B | 81H | ND1 | Va | 27T | O   | 4.34 |  |   | 1 | 1 |
| B | 81H | CE1 | Va | 27T | O   | 4.39 |  |   | 1 | 1 |
| B | 81H | CE1 | Va | 27T | OG1 | 4.19 |  |   | 1 | 1 |

|   |     |     |    |     |     |      |   |   |   |
|---|-----|-----|----|-----|-----|------|---|---|---|
| B | 85E | CD  | Va | 27T | OG1 | 4.38 |   | 1 | 1 |
| B | 85E | OE1 | Va | 27T | CB  | 4.29 |   | 1 | 1 |
| B | 85E | OE1 | Va | 27T | OG1 | 3.37 | 1 |   | 1 |
| B | 85E | OE1 | Va | 27T | CG2 | 4.20 |   | 1 | 1 |
| P | -1E | CD  | Va | 96S | CB  | 3.86 |   | 1 | 1 |
| P | -1E | CD  | Va | 96S | OG  | 3.76 |   | 1 | 1 |
| P | -1E | OE1 | Va | 96S | CB  | 4.07 |   | 1 | 1 |
| P | -1E | OE1 | Va | 96S | OG  | 3.95 |   | 1 | 1 |
| P | -1E | OE1 | Va | 26D | OD1 | 4.48 |   | 1 | 1 |
| P | -1E | OE1 | Va | 28A | CB  | 4.04 |   | 1 | 1 |
| P | -1E | OE2 | Va | 96S | CA  | 3.99 |   | 1 | 1 |
| P | -1E | OE2 | Va | 96S | CB  | 3.07 |   | 1 | 1 |
| P | -1E | OE2 | Va | 96S | OG  | 2.81 | 1 |   | 1 |
| P | 2L  | CA  | Va | 95N | O   | 3.47 |   | 1 | 1 |
| P | 2L  | C   | Va | 95N | O   | 3.73 |   | 1 | 1 |
| P | 2L  | CB  | Va | 95N | C   | 4.26 | 1 |   | 1 |
| P | 2L  | CB  | Va | 95N | O   | 3.31 |   | 1 | 1 |
| P | 2L  | CB  | Va | 95N | CB  | 4.25 | 1 |   | 1 |
| P | 2L  | CG  | Va | 95N | C   | 4.36 | 1 |   | 1 |
| P | 2L  | CG  | Va | 95N | O   | 3.67 |   | 1 | 1 |
| P | 2L  | CD1 | Va | 28A | CB  | 4.30 | 1 |   | 1 |
| P | 2L  | CD1 | Va | 28A | O   | 4.28 |   | 1 | 1 |
| P | 2L  | CD1 | Va | 95N | C   | 4.47 | 1 |   | 1 |
| P | 2L  | CD1 | Va | 95N | O   | 4.15 |   | 1 | 1 |
| P | 2L  | CD1 | Va | 95N | CB  | 4.34 | 1 |   | 1 |
| P | 2L  | CD2 | Va | 96S | N   | 3.94 |   | 1 | 1 |
| P | 2L  | CD2 | Va | 96S | CA  | 3.80 | 1 |   | 1 |
| P | 2L  | CD2 | Va | 96S | CB  | 3.49 | 1 |   | 1 |
| P | 2L  | CD2 | Va | 95N | C   | 3.72 | 1 |   | 1 |
| P | 2L  | CD2 | Va | 95N | O   | 3.14 |   | 1 | 1 |
| P | 3Y  | N   | Va | 95N | C   | 4.15 |   | 1 | 1 |
| P | 3Y  | N   | Va | 95N | O   | 3.02 | 1 |   | 1 |
| P | 3Y  | N   | Va | 95N | CB  | 4.21 |   | 1 | 1 |
| P | 3Y  | CA  | Va | 95N | O   | 4.03 |   | 1 | 1 |
| P | 3Y  | C   | Va | 95N | O   | 4.32 |   | 1 | 1 |
| P | 3Y  | C   | Va | 95N | CB  | 4.36 | 1 |   | 1 |
| P | 3Y  | C   | Va | 95N | ND2 | 4.00 |   | 1 | 1 |
| P | 3Y  | O   | Va | 95N | CA  | 3.86 |   | 1 | 1 |
| P | 3Y  | O   | Va | 95N | C   | 4.18 |   | 1 | 1 |
| P | 3Y  | O   | Va | 95N | O   | 3.74 |   | 1 | 1 |
| P | 3Y  | O   | Va | 95N | CB  | 3.54 |   | 1 | 1 |
| P | 3Y  | O   | Va | 95N | CG  | 3.85 |   | 1 | 1 |
| P | 3Y  | O   | Va | 95N | ND2 | 3.19 | 1 |   | 1 |
| P | 3Y  | CB  | Va | 95N | O   | 4.27 |   | 1 | 1 |
| P | 3Y  | CG  | Va | 95N | O   | 4.16 |   | 1 | 1 |
| P | 3Y  | CD1 | Va | 96S | N   | 4.46 |   | 1 | 1 |
| P | 3Y  | CD1 | Va | 96S | CA  | 4.47 | 1 |   | 1 |

|   |    |     |    |      |     |      |    |    |     |    |    |     |
|---|----|-----|----|------|-----|------|----|----|-----|----|----|-----|
| P | 3Y | CD1 | Va | 97G  | N   | 3.96 |    |    | 1   |    | 1  |     |
| P | 3Y | CD1 | Va | 97G  | CA  | 4.26 |    | 1  |     |    | 1  |     |
| P | 3Y | CD1 | Va | 95N  | C   | 3.89 |    | 1  |     |    | 1  |     |
| P | 3Y | CD1 | Va | 95N  | O   | 3.45 |    |    | 1   |    | 1  |     |
| P | 3Y | CE1 | Va | 96S  | C   | 4.22 |    | 1  |     |    | 1  |     |
| P | 3Y | CE1 | Va | 97G  | N   | 3.67 |    |    | 1   |    | 1  |     |
| P | 3Y | CE1 | Va | 97G  | CA  | 3.57 |    | 1  |     |    | 1  |     |
| P | 3Y | CE1 | Va | 100N | CG  | 4.38 |    | 1  |     |    | 1  |     |
| P | 3Y | CE1 | Va | 100N | OD1 | 4.41 |    |    | 1   |    | 1  |     |
| P | 3Y | CE1 | Va | 100N | ND2 | 3.50 |    |    | 1   |    | 1  |     |
| P | 3Y | CE1 | Va | 95N  | C   | 4.26 |    | 1  |     |    | 1  |     |
| P | 3Y | CE1 | Va | 95N  | O   | 4.20 |    |    | 1   |    | 1  |     |
| P | 3Y | CZ  | Va | 97G  | CA  | 4.48 |    | 1  |     |    | 1  |     |
| P | 3Y | CZ  | Va | 100N | ND2 | 3.71 |    |    | 1   |    | 1  |     |
| P | 3Y | OH  | Vb | 97L  | CD1 | 4.16 |    |    | 1   |    | 1  |     |
| P | 3Y | OH  | Va | 100N | CG  | 4.21 |    |    | 1   |    | 1  |     |
| P | 3Y | OH  | Va | 100N | ND2 | 3.11 | 1  |    |     |    | 1  |     |
| P | 4L | N   | Va | 95N  | ND2 | 4.41 |    |    | 1   |    | 1  |     |
| P | 4L | CA  | Va | 95N  | ND2 | 4.06 |    |    | 1   |    | 1  |     |
| P | 5V | N   | Va | 95N  | ND2 | 4.47 |    |    | 1   |    | 1  |     |
| P | 5V | CG1 | Vb | 97L  | CD1 | 4.27 |    | 1  |     |    | 1  |     |
| P | 5V | CG2 | Va | 94S  | O   | 3.65 |    |    | 1   |    | 1  |     |
| P | 5V | CG2 | Va | 95N  | CG  | 4.29 |    | 1  |     |    | 1  |     |
| P | 5V | CG2 | Va | 95N  | ND2 | 3.62 |    |    | 1   |    | 1  |     |
| P | 8E | CD  | Vb | 51R  | NH2 | 3.52 |    |    | 1   |    | 1  |     |
| P | 8E | OE1 | Vb | 51R  | NH2 | 3.74 | 1  |    |     |    | 1  |     |
| P | 8E | OE2 | Vb | 51R  | NE  | 3.93 | 1  |    |     |    | 1  |     |
| P | 8E | OE2 | Vb | 51R  | CZ  | 3.67 |    |    | 1   |    | 1  |     |
| P | 8E | OE2 | Vb | 51R  | NH2 | 2.62 | 1  |    |     |    | 1  |     |
|   |    |     |    |      |     |      | 15 | 58 | 139 | 23 | 72 | 117 |
|   |    |     |    |      |     |      |    |    | 212 |    |    | 212 |

Contacts of 8F10 TCR with IAg7-8G9E

| TCR V | TCR AA | TCR atom | pMHC Chain | pMHC AA | pMHC atom | dist Å | Hbond salt | VDW VDWC-C | VDW other | MHC $\alpha$ | PEP | MHC $\beta$ |
|-------|--------|----------|------------|---------|-----------|--------|------------|------------|-----------|--------------|-----|-------------|
| Va    | 30N    | ND2      | P          | 2L      | CD1       | 4.46   |            |            | 1         |              | 1   |             |
| Va    | 48D    | OD1      | B          | 69E     | OE1       | 3.80   |            |            | 1         |              |     | 1           |
| Va    | 50R    | CD       | B          | 70R     | CA        | 3.95   |            | 1          |           |              |     | 1           |
| Va    | 50R    | CD       | B          | 70R     | CB        | 4.46   |            | 1          |           |              |     | 1           |
| Va    | 50R    | CD       | B          | 70R     | N         | 4.15   |            |            | 1         |              |     | 1           |
| Va    | 50R    | CD       | B          | 73A     | CB        | 4.02   |            | 1          |           |              |     | 1           |
| Va    | 50R    | CZ       | B          | 69E     | CG        | 4.48   |            | 1          |           |              |     | 1           |
| Va    | 50R    | CZ       | B          | 70R     | CA        | 3.62   |            | 1          |           |              |     | 1           |
| Va    | 50R    | CZ       | B          | 70R     | CB        | 3.25   |            | 1          |           |              |     | 1           |
| Va    | 50R    | CZ       | B          | 70R     | CG        | 3.86   |            | 1          |           |              |     | 1           |
| Va    | 50R    | CZ       | B          | 70R     | N         | 3.86   |            |            | 1         |              |     | 1           |
| Va    | 50R    | NE       | B          | 69E     | CG        | 4.07   |            |            | 1         |              |     | 1           |
| Va    | 50R    | NE       | B          | 70R     | CA        | 3.64   |            |            | 1         |              |     | 1           |
| Va    | 50R    | NE       | B          | 70R     | CB        | 3.82   |            |            | 1         |              |     | 1           |
| Va    | 50R    | NE       | B          | 70R     | N         | 3.61   |            |            | 1         |              |     | 1           |
| Va    | 50R    | NH1      | B          | 70R     | CA        | 3.84   |            |            | 1         |              |     | 1           |
| Va    | 50R    | NH1      | B          | 70R     | CB        | 3.28   |            |            | 1         |              |     | 1           |
| Va    | 50R    | NH1      | B          | 70R     | CG        | 3.34   |            |            | 1         |              |     | 1           |
| Va    | 50R    | NH2      | B          | 69E     | CB        | 4.49   |            |            | 1         |              |     | 1           |
| Va    | 50R    | NH2      | B          | 69E     | CG        | 4.00   |            |            | 1         |              |     | 1           |
| Va    | 50R    | NH2      | B          | 70R     | CA        | 4.04   |            |            | 1         |              |     | 1           |
| Va    | 50R    | NH2      | B          | 70R     | CB        | 3.37   |            |            | 1         |              |     | 1           |
| Va    | 50R    | NH2      | B          | 70R     | CG        | 4.17   |            |            | 1         |              |     | 1           |
| Va    | 50R    | NH2      | B          | 70R     | N         | 4.02   |            |            | 1         |              |     | 1           |
| Va    | 51S    | OG       | B          | 77T     | CG2       | 4.10   |            |            | 1         |              |     | 1           |
| Va    | 52N    | CB       | B          | 73A     | CA        | 4.49   |            | 1          |           |              |     | 1           |
| Va    | 52N    | CB       | B          | 73A     | CB        | 3.97   |            | 1          |           |              |     | 1           |
| Va    | 52N    | CG       | B          | 73A     | CA        | 4.14   |            | 1          |           |              |     | 1           |
| Va    | 52N    | CG       | B          | 73A     | CB        | 4.03   |            | 1          |           |              |     | 1           |
| Va    | 52N    | N        | B          | 77T     | CG2       | 4.45   |            |            | 1         |              |     | 1           |
| Va    | 52N    | ND2      | B          | 73A     | CA        | 3.63   |            |            | 1         |              |     | 1           |
| Va    | 52N    | ND2      | B          | 73A     | CB        | 3.49   |            |            | 1         |              |     | 1           |
| Va    | 52N    | ND2      | B          | 73A     | N         | 4.14   |            |            | 1         |              |     | 1           |
| Va    | 52N    | OD1      | B          | 76D     | CB        | 4.28   |            |            | 1         |              |     | 1           |
| Va    | 52N    | OD1      | B          | 76D     | OD2       | 3.90   |            |            | 1         |              |     | 1           |
| Va    | 56K    | CD       | B          | 69E     | OE1       | 4.08   |            |            | 1         |              |     | 1           |
| Va    | 56K    | CE       | B          | 69E     | CD        | 4.17   |            | 1          |           |              |     | 1           |
| Va    | 56K    | CE       | B          | 69E     | OE1       | 3.32   |            |            | 1         |              |     | 1           |
| Va    | 56K    | CE       | B          | 69E     | OE2       | 4.35   |            |            | 1         |              |     | 1           |
| Va    | 56K    | NZ       | B          | 69E     | CD        | 3.73   |            |            | 1         |              |     | 1           |
| Va    | 56K    | NZ       | B          | 69E     | OE1       | 2.60   | 1          |            |           |              |     | 1           |
| Va    | 56K    | NZ       | B          | 69E     | OE2       | 4.32   |            |            | 1         |              |     | 1           |
| Va    | 93R    | CD       | P          | -1E     | OE1       | 3.41   |            |            | 1         |              | 1   |             |

|    |     |     |   |     |     |      |   |   |   |
|----|-----|-----|---|-----|-----|------|---|---|---|
| Va | 93R | NE  | P | -1E | OE1 | 4.08 |   | 1 | 1 |
| Va | 94R | CD  | B | 77T | CB  | 3.85 |   | 1 | 1 |
| Va | 94R | CD  | B | 77T | OG1 | 3.28 |   | 1 | 1 |
| Va | 94R | CZ  | B | 70R | O   | 4.37 |   | 1 | 1 |
| Va | 94R | CZ  | B | 73A | CB  | 4.18 |   | 1 | 1 |
| Va | 94R | CZ  | B | 77T | CB  | 3.85 |   | 1 | 1 |
| Va | 94R | CZ  | B | 77T | CG2 | 3.80 |   | 1 | 1 |
| Va | 94R | CZ  | B | 77T | OG1 | 3.24 |   | 1 | 1 |
| Va | 94R | NE  | B | 77T | CB  | 3.31 |   | 1 | 1 |
| Va | 94R | NE  | B | 77T | CG2 | 3.58 |   | 1 | 1 |
| Va | 94R | NE  | B | 77T | OG1 | 2.93 | 1 |   | 1 |
| Va | 94R | NH1 | B | 73A | C   | 4.21 |   | 1 | 1 |
| Va | 94R | NH1 | B | 73A | CA  | 4.35 |   | 1 | 1 |
| Va | 94R | NH1 | B | 73A | CB  | 3.27 |   | 1 | 1 |
| Va | 94R | NH1 | B | 73A | O   | 4.23 |   | 1 | 1 |
| Va | 94R | NH1 | B | 77T | CB  | 3.95 |   | 1 | 1 |
| Va | 94R | NH1 | B | 77T | CG2 | 3.38 |   | 1 | 1 |
| Va | 94R | NH1 | B | 77T | OG1 | 3.61 |   | 1 | 1 |
| Va | 94R | NH2 | B | 70R | C   | 4.22 |   | 1 | 1 |
| Va | 94R | NH2 | B | 70R | CA  | 4.12 |   | 1 | 1 |
| Va | 94R | NH2 | B | 70R | CB  | 4.45 |   | 1 | 1 |
| Va | 94R | NH2 | B | 70R | CD  | 4.37 |   | 1 | 1 |
| Va | 94R | NH2 | B | 70R | CG  | 3.80 |   | 1 | 1 |
| Va | 94R | NH2 | B | 70R | O   | 3.42 | 1 |   | 1 |
| Va | 94R | NH2 | B | 73A | CB  | 4.38 |   | 1 | 1 |
| Va | 94R | NH2 | B | 74E | CG  | 4.49 |   | 1 | 1 |
| Va | 94R | NH2 | B | 77T | OG1 | 3.89 |   | 1 | 1 |
| Va | 95G | C   | P | 3Y  | O   | 3.93 |   | 1 | 1 |
| Va | 95G | O   | P | 3Y  | O   | 3.41 | 1 |   | 1 |
| Va | 95G | O   | P | 5V  | CG2 | 4.33 |   | 1 | 1 |
| Va | 96S | C   | P | 2L  | CD2 | 4.34 |   | 1 | 1 |
| Va | 96S | C   | P | 3Y  | CE2 | 4.15 |   | 1 | 1 |
| Va | 96S | CA  | P | 2L  | CD2 | 4.17 |   | 1 | 1 |
| Va | 96S | CA  | P | 3Y  | CD2 | 3.34 |   | 1 | 1 |
| Va | 96S | CA  | P | 3Y  | CE2 | 3.15 |   | 1 | 1 |
| Va | 96S | CA  | P | 3Y  | CG  | 4.10 |   | 1 | 1 |
| Va | 96S | CA  | P | 3Y  | CZ  | 3.81 |   | 1 | 1 |
| Va | 96S | CA  | P | 3Y  | N   | 4.27 |   | 1 | 1 |
| Va | 96S | CA  | P | 3Y  | OH  | 4.36 |   | 1 | 1 |
| Va | 96S | CB  | P | -1E | OE2 | 3.96 |   | 1 | 1 |
| Va | 96S | CB  | P | 1R  | O   | 3.96 |   | 1 | 1 |
| Va | 96S | CB  | P | 2L  | C   | 4.31 |   | 1 | 1 |
| Va | 96S | CB  | P | 2L  | CA  | 3.84 |   | 1 | 1 |
| Va | 96S | CB  | P | 2L  | CD2 | 3.88 |   | 1 | 1 |
| Va | 96S | CB  | P | 3Y  | CB  | 4.46 |   | 1 | 1 |
| Va | 96S | CB  | P | 3Y  | CD2 | 2.97 |   | 1 | 1 |
| Va | 96S | CB  | P | 3Y  | CE2 | 3.25 |   | 1 | 1 |

|    |      |     |   |     |     |      |   |   |   |
|----|------|-----|---|-----|-----|------|---|---|---|
| Va | 96S  | CB  | P | 3Y  | CG  | 3.87 | 1 |   | 1 |
| Va | 96S  | CB  | P | 3Y  | CZ  | 4.32 | 1 |   | 1 |
| Va | 96S  | CB  | P | 3Y  | N   | 3.67 |   | 1 | 1 |
| Va | 96S  | N   | P | 2L  | C   | 4.46 |   | 1 | 1 |
| Va | 96S  | N   | P | 2L  | CA  | 4.07 |   | 1 | 1 |
| Va | 96S  | N   | P | 2L  | CB  | 3.94 |   | 1 | 1 |
| Va | 96S  | N   | P | 2L  | CD2 | 3.74 |   | 1 | 1 |
| Va | 96S  | N   | P | 2L  | CG  | 4.26 |   | 1 | 1 |
| Va | 96S  | N   | P | 3Y  | CD2 | 3.95 |   | 1 | 1 |
| Va | 96S  | N   | P | 3Y  | CE2 | 4.01 |   | 1 | 1 |
| Va | 96S  | N   | P | 3Y  | CG  | 4.25 |   | 1 | 1 |
| Va | 96S  | N   | P | 3Y  | CZ  | 4.38 |   | 1 | 1 |
| Va | 96S  | N   | P | 3Y  | N   | 3.79 |   | 1 | 1 |
| Va | 96S  | N   | P | 3Y  | O   | 3.89 |   | 1 | 1 |
| Va | 96S  | O   | P | -1E | OE1 | 4.21 |   | 1 | 1 |
| Va | 96S  | O   | P | 2L  | CD2 | 4.00 |   | 1 | 1 |
| Va | 96S  | OG  | A | 55E | CB  | 4.37 |   | 1 | 1 |
| Va | 96S  | OG  | A | 55E | O   | 3.85 |   | 1 | 1 |
| Va | 96S  | OG  | A | 58G | CA  | 4.25 |   | 1 | 1 |
| Va | 96S  | OG  | P | -1E | OE2 | 3.70 |   | 1 | 1 |
| Va | 96S  | OG  | P | 1R  | O   | 4.35 |   | 1 | 1 |
| Va | 96S  | OG  | P | 3Y  | CD2 | 3.12 |   | 1 | 1 |
| Va | 96S  | OG  | P | 3Y  | CE2 | 3.14 |   | 1 | 1 |
| Va | 96S  | OG  | P | 3Y  | CG  | 4.34 |   | 1 | 1 |
| Va | 96S  | OG  | P | 3Y  | CZ  | 4.39 |   | 1 | 1 |
| Va | 97G  | C   | A | 55E | CB  | 4.34 | 1 |   | 1 |
| Va | 97G  | N   | P | 3Y  | CE2 | 3.95 |   | 1 | 1 |
| Va | 97G  | O   | A | 57Q | C   | 4.13 |   | 1 | 1 |
| Va | 97G  | O   | A | 57Q | CB  | 4.18 |   | 1 | 1 |
| Va | 97G  | O   | A | 58G | CA  | 3.91 |   | 1 | 1 |
| Va | 97G  | O   | A | 58G | N   | 3.71 |   | 1 | 1 |
| Va | 97G  | O   | P | 3Y  | CE2 | 4.28 |   | 1 | 1 |
| Va | 98G  | C   | A | 55E | OE1 | 4.06 |   | 1 | 1 |
| Va | 98G  | CA  | A | 55E | CB  | 4.04 | 1 |   | 1 |
| Va | 98G  | CA  | A | 55E | CD  | 4.30 | 1 |   | 1 |
| Va | 98G  | CA  | A | 55E | CG  | 4.08 | 1 |   | 1 |
| Va | 98G  | CA  | A | 55E | OE1 | 4.07 |   | 1 | 1 |
| Va | 98G  | N   | A | 55E | CB  | 4.09 |   | 1 | 1 |
| Va | 98G  | N   | A | 57Q | CB  | 4.44 |   | 1 | 1 |
| Va | 99S  | CA  | A | 55E | OE1 | 4.44 |   | 1 | 1 |
| Va | 99S  | CB  | A | 55E | OE1 | 4.25 |   | 1 | 1 |
| Va | 99S  | N   | A | 55E | CD  | 4.43 |   | 1 | 1 |
| Va | 99S  | N   | A | 55E | OE1 | 3.56 |   | 1 | 1 |
| Va | 101Y | CE1 | P | 3Y  | OH  | 4.50 |   | 1 | 1 |
| Vb | 26N  | CB  | A | 68H | CE1 | 3.85 | 1 |   | 1 |
| Vb | 26N  | CB  | A | 68H | ND1 | 4.03 |   | 1 | 1 |
| Vb | 26N  | CG  | A | 68H | CE1 | 3.79 | 1 |   | 1 |



|    |     |     |   |     |     |      |   |   |   |
|----|-----|-----|---|-----|-----|------|---|---|---|
| Vb | 26N | CG  | A | 68H | ND1 | 3.56 |   | 1 | 1 |
| Vb | 26N | ND2 | A | 68H | ND1 | 3.97 |   | 1 | 1 |
| Vb | 26N | OD1 | A | 68H | CE1 | 3.68 |   | 1 | 1 |
| Vb | 26N | OD1 | A | 68H | ND1 | 3.52 |   | 1 | 1 |
| Vb | 28N | CB  | A | 61Q | OE1 | 4.05 |   | 1 | 1 |
| Vb | 28N | CG  | A | 61Q | OE1 | 3.38 |   | 1 | 1 |
| Vb | 28N | CG  | A | 64A | CB  | 3.62 | 1 |   | 1 |
| Vb | 28N | ND2 | A | 61Q | CA  | 3.75 |   | 1 | 1 |
| Vb | 28N | ND2 | A | 61Q | CB  | 4.22 |   | 1 | 1 |
| Vb | 28N | ND2 | A | 61Q | CD  | 3.53 |   | 1 | 1 |
| Vb | 28N | ND2 | A | 61Q | CG  | 4.44 |   | 1 | 1 |
| Vb | 28N | ND2 | A | 61Q | NE2 | 4.43 |   | 1 | 1 |
| Vb | 28N | ND2 | A | 61Q | O   | 4.28 |   | 1 | 1 |
| Vb | 28N | ND2 | A | 61Q | OE1 | 2.38 | 1 |   | 1 |
| Vb | 28N | ND2 | A | 64A | CB  | 3.47 |   | 1 | 1 |
| Vb | 28N | OD1 | A | 61Q | OE1 | 4.19 |   | 1 | 1 |
| Vb | 28N | OD1 | A | 64A | CB  | 3.32 |   | 1 | 1 |
| Vb | 29N | CG  | A | 61Q | CD  | 4.49 | 1 |   | 1 |
| Vb | 29N | CG  | A | 61Q | NE2 | 4.35 |   | 1 | 1 |
| Vb | 29N | CG  | A | 61Q | OE1 | 3.91 |   | 1 | 1 |
| Vb | 29N | ND2 | A | 61Q | CD  | 4.36 |   | 1 | 1 |
| Vb | 29N | ND2 | A | 61Q | OE1 | 3.67 |   | 1 | 1 |
| Vb | 29N | OD1 | A | 61Q | CD  | 3.78 |   | 1 | 1 |
| Vb | 29N | OD1 | A | 61Q | NE2 | 3.47 | 1 |   | 1 |
| Vb | 29N | OD1 | A | 61Q | OE1 | 3.31 | 1 |   | 1 |
| Vb | 48Y | CB  | A | 57Q | CD  | 3.74 | 1 |   | 1 |
| Vb | 48Y | CB  | A | 57Q | NE2 | 3.73 |   | 1 | 1 |
| Vb | 48Y | CB  | A | 57Q | OE1 | 3.38 |   | 1 | 1 |
| Vb | 48Y | CB  | A | 61Q | NE2 | 4.41 |   | 1 | 1 |
| Vb | 48Y | CD1 | A | 57Q | CD  | 4.21 | 1 |   | 1 |
| Vb | 48Y | CD1 | A | 57Q | NE2 | 3.93 |   | 1 | 1 |
| Vb | 48Y | CD1 | A | 61Q | NE2 | 3.65 |   | 1 | 1 |
| Vb | 48Y | CD2 | A | 57Q | CD  | 3.32 | 1 |   | 1 |
| Vb | 48Y | CD2 | A | 57Q | CG  | 3.67 | 1 |   | 1 |
| Vb | 48Y | CD2 | A | 57Q | NE2 | 3.85 |   | 1 | 1 |
| Vb | 48Y | CD2 | A | 57Q | OE1 | 3.27 |   | 1 | 1 |
| Vb | 48Y | CE1 | A | 61Q | NE2 | 4.16 |   | 1 | 1 |
| Vb | 48Y | CE2 | A | 57Q | CD  | 3.93 | 1 |   | 1 |
| Vb | 48Y | CE2 | A | 57Q | CG  | 3.76 | 1 |   | 1 |
| Vb | 48Y | CE2 | A | 57Q | NE2 | 4.44 |   | 1 | 1 |
| Vb | 48Y | CE2 | A | 57Q | OE1 | 4.18 |   | 1 | 1 |
| Vb | 48Y | CG  | A | 57Q | CD  | 3.51 | 1 |   | 1 |
| Vb | 48Y | CG  | A | 57Q | CG  | 4.25 | 1 |   | 1 |
| Vb | 48Y | CG  | A | 57Q | NE2 | 3.58 |   | 1 | 1 |
| Vb | 48Y | CG  | A | 57Q | OE1 | 3.51 |   | 1 | 1 |
| Vb | 48Y | CG  | A | 61Q | NE2 | 4.18 |   | 1 | 1 |
| Vb | 48Y | CZ  | A | 57Q | CG  | 4.38 | 1 |   | 1 |

|        |      |     |   |     |     |      |   |    |     |     |    |    |     |
|--------|------|-----|---|-----|-----|------|---|----|-----|-----|----|----|-----|
| Vb     | 52S  | OG  | A | 39K | NZ  | 4.44 |   | 1  | 1   |     |    |    |     |
| Vb     | 94L  | C   | B | 67Y | OH  | 4.09 |   | 1  |     | 1   |    |    |     |
| vb     | 94L  | C   | P | 8G  | CA  | 3.82 |   | 1  |     | 1   |    |    |     |
| Vb     | 94L  | C   | P | 8G  | N   | 3.59 |   |    | 1   | 1   |    |    |     |
| Vb     | 94L  | CA  | A | 65A | CB  | 4.10 |   | 1  |     | 1   |    |    |     |
| Vb     | 94L  | CB  | A | 65A | CA  | 3.96 |   | 1  |     | 1   |    |    |     |
| Vb     | 94L  | CB  | A | 65A | CB  | 3.93 |   | 1  |     | 1   |    |    |     |
| vb     | 94L  | CB  | P | 8G  | CA  | 4.32 |   | 1  |     |     | 1  |    |     |
| Vb     | 94L  | CD1 | A | 68H | CE1 | 4.45 |   | 1  |     | 1   |    |    |     |
| Vb     | 94L  | CD2 | A | 64A | O   | 4.45 |   |    | 1   | 1   |    |    |     |
| Vb     | 94L  | CD2 | A | 68H | CB  | 3.73 |   | 1  |     | 1   |    |    |     |
| Vb     | 94L  | CD2 | A | 68H | CD2 | 4.14 |   | 1  |     | 1   |    |    |     |
| Vb     | 94L  | CD2 | A | 68H | CE1 | 3.89 |   | 1  |     | 1   |    |    |     |
| Vb     | 94L  | CD2 | A | 68H | CG  | 3.50 |   | 1  |     | 1   |    |    |     |
| Vb     | 94L  | CD2 | A | 68H | ND1 | 3.32 |   |    | 1   | 1   |    |    |     |
| Vb     | 94L  | CD2 | A | 68H | NE2 | 4.35 |   |    | 1   | 1   |    |    |     |
| Vb     | 94L  | O   | B | 67Y | OH  | 3.41 | 1 |    |     |     | 1  |    |     |
| Vb     | 94L  | O   | P | 8G  | C   | 4.14 |   |    | 1   |     | 1  |    |     |
| Vb     | 94L  | O   | P | 8G  | CA  | 3.17 |   |    | 1   |     | 1  |    |     |
| Vb     | 94L  | O   | P | 8G  | N   | 3.26 | 1 |    |     |     | 1  |    |     |
| Vb     | 95G  | C   | B | 70R | NH1 | 4.44 |   |    | 1   |     | 1  |    |     |
| Vb     | 95G  | CA  | P | 6C  | O   | 4.16 |   |    | 1   |     | 1  |    |     |
| Vb     | 95G  | N   | B | 67Y | CE1 | 4.15 |   |    | 1   |     | 1  |    |     |
| Vb     | 95G  | N   | B | 67Y | CZ  | 4.44 |   |    | 1   |     | 1  |    |     |
| Vb     | 95G  | N   | B | 67Y | OH  | 3.89 |   |    | 1   |     | 1  |    |     |
| Vb     | 95G  | N   | P | 6C  | O   | 4.36 |   |    | 1   |     | 1  |    |     |
| Vb     | 95G  | N   | P | 8G  | CA  | 4.31 |   |    | 1   |     | 1  |    |     |
| Vb     | 95G  | N   | P | 8G  | N   | 3.61 |   |    | 1   |     | 1  |    |     |
| Vb     | 95G  | O   | B | 67Y | CE1 | 4.21 |   |    | 1   |     | 1  |    |     |
| Vb     | 95G  | O   | B | 70R | CZ  | 4.29 |   |    | 1   |     | 1  |    |     |
| Vb     | 95G  | O   | B | 70R | NE  | 4.47 |   |    | 1   |     | 1  |    |     |
| Vb     | 95G  | O   | B | 70R | NH1 | 3.31 | 1 |    |     |     | 1  |    |     |
| Vb     | 95G  | O   | P | 5V  | CG1 | 3.98 |   |    | 1   |     | 1  |    |     |
| Vb     | 96G  | O   | B | 64Q | O   | 4.48 |   |    | 1   |     | 1  |    |     |
| Vb     | 96G  | O   | B | 64Q | OE1 | 4.32 |   |    | 1   |     | 1  |    |     |
| Vb     | 96G  | O   | B | 67Y | CD1 | 3.87 |   |    | 1   |     | 1  |    |     |
| Vb     | 96G  | O   | B | 67Y | CE1 | 3.53 |   |    | 1   |     | 1  |    |     |
| Vb     | 97D  | OD1 | B | 70R | CB  | 4.32 |   |    | 1   |     | 1  |    |     |
| Vb     | 97D  | OD1 | B | 70R | CD  | 4.41 |   |    | 1   |     | 1  |    |     |
| Vb     | 97D  | OD1 | B | 70R | CG  | 3.48 |   |    | 1   |     | 1  |    |     |
| Vb     | 97D  | OD1 | B | 70R | NE  | 4.16 |   |    | 1   |     | 1  |    |     |
| Vb     | 100Y | CZ  | B | 64Q | NE2 | 4.49 |   |    | 1   |     | 1  |    |     |
| Vb     | 100Y | OH  | B | 64Q | CD  | 4.35 |   |    | 1   |     | 1  |    |     |
| Vb     | 100Y | OH  | B | 64Q | NE2 | 3.21 | 1 |    |     |     | 1  |    |     |
| Totals |      |     |   |     |     |      |   | 11 | 58  | 159 | 81 | 59 | 88  |
|        |      |     |   |     |     |      |   |    | 228 |     |    |    | 228 |

Contacts of IAg7-8G9E with 8F10 TCR

| pMHC Chain | pMHC AA | pMHC atom | TCR V | TCR AA | TCR atom | dist Å | Hbond salt | VDW VDW-C | VDW other | MHC $\alpha$ | PEP | MHC $\beta$ |
|------------|---------|-----------|-------|--------|----------|--------|------------|-----------|-----------|--------------|-----|-------------|
| A          | 39K     | NZ        | Vb    | 52S    | OG       | 4.44   |            |           | 1         | 1            |     |             |
| A          | 55E     | CB        | Va    | 96S    | OG       | 4.37   |            |           | 1         | 1            |     |             |
| A          | 55E     | CB        | Va    | 97G    | C        | 4.34   |            | 1         |           | 1            |     |             |
| A          | 55E     | CB        | Va    | 98G    | CA       | 4.04   |            | 1         |           | 1            |     |             |
| A          | 55E     | CB        | Va    | 98G    | N        | 4.09   |            |           | 1         | 1            |     |             |
| A          | 55E     | CD        | Va    | 98G    | CA       | 4.30   |            | 1         |           | 1            |     |             |
| A          | 55E     | CD        | Va    | 99S    | N        | 4.43   |            |           | 1         | 1            |     |             |
| A          | 55E     | CG        | Va    | 98G    | CA       | 4.08   |            | 1         |           | 1            |     |             |
| A          | 55E     | O         | Va    | 96S    | OG       | 3.85   |            |           | 1         | 1            |     |             |
| A          | 55E     | OE1       | Va    | 98G    | C        | 4.06   |            |           | 1         | 1            |     |             |
| A          | 55E     | OE1       | Va    | 98G    | CA       | 4.07   |            |           | 1         | 1            |     |             |
| A          | 55E     | OE1       | Va    | 99S    | CA       | 4.44   |            |           | 1         | 1            |     |             |
| A          | 55E     | OE1       | Va    | 99S    | CB       | 4.25   |            |           | 1         | 1            |     |             |
| A          | 55E     | OE1       | Va    | 99S    | N        | 3.56   |            |           | 1         | 1            |     |             |
| A          | 57Q     | C         | Va    | 97G    | O        | 4.13   |            |           | 1         | 1            |     |             |
| A          | 57Q     | CB        | Va    | 97G    | O        | 4.18   |            |           | 1         | 1            |     |             |
| A          | 57Q     | CB        | Va    | 98G    | N        | 4.44   |            |           | 1         | 1            |     |             |
| A          | 57Q     | CD        | Vb    | 48Y    | CB       | 3.74   |            | 1         |           | 1            |     |             |
| A          | 57Q     | CD        | Vb    | 48Y    | CD1      | 4.21   |            | 1         |           | 1            |     |             |
| A          | 57Q     | CD        | Vb    | 48Y    | CD2      | 3.32   |            | 1         |           | 1            |     |             |
| A          | 57Q     | CD        | Vb    | 48Y    | CE2      | 3.93   |            | 1         |           | 1            |     |             |
| A          | 57Q     | CD        | Vb    | 48Y    | CG       | 3.51   |            | 1         |           | 1            |     |             |
| A          | 57Q     | CG        | Vb    | 48Y    | CD2      | 3.67   |            | 1         |           | 1            |     |             |
| A          | 57Q     | CG        | Vb    | 48Y    | CE2      | 3.76   |            | 1         |           | 1            |     |             |
| A          | 57Q     | CG        | Vb    | 48Y    | CG       | 4.25   |            | 1         |           | 1            |     |             |
| A          | 57Q     | CG        | Vb    | 48Y    | CZ       | 4.38   |            | 1         |           | 1            |     |             |
| A          | 57Q     | NE2       | Vb    | 48Y    | CB       | 3.73   |            |           | 1         | 1            |     |             |
| A          | 57Q     | NE2       | Vb    | 48Y    | CD1      | 3.93   |            |           | 1         | 1            |     |             |
| A          | 57Q     | NE2       | Vb    | 48Y    | CD2      | 3.85   |            |           | 1         | 1            |     |             |
| A          | 57Q     | NE2       | Vb    | 48Y    | CE2      | 4.44   |            |           | 1         | 1            |     |             |
| A          | 57Q     | NE2       | Vb    | 48Y    | CG       | 3.58   |            |           | 1         | 1            |     |             |
| A          | 57Q     | OE1       | Vb    | 48Y    | CB       | 3.38   |            |           | 1         | 1            |     |             |
| A          | 57Q     | OE1       | Vb    | 48Y    | CD2      | 3.27   |            |           | 1         | 1            |     |             |
| A          | 57Q     | OE1       | Vb    | 48Y    | CE2      | 4.18   |            |           | 1         | 1            |     |             |
| A          | 57Q     | OE1       | Vb    | 48Y    | CG       | 3.51   |            |           | 1         | 1            |     |             |
| A          | 58G     | CA        | Va    | 96S    | OG       | 4.25   |            |           | 1         | 1            |     |             |
| A          | 58G     | CA        | Va    | 97G    | O        | 3.91   |            |           | 1         | 1            |     |             |
| A          | 58G     | N         | Va    | 97G    | O        | 3.71   |            |           | 1         | 1            |     |             |
| A          | 61Q     | CA        | Vb    | 28N    | ND2      | 3.75   |            |           | 1         | 1            |     |             |
| A          | 61Q     | CB        | Vb    | 28N    | ND2      | 4.22   |            |           | 1         | 1            |     |             |
| A          | 61Q     | CD        | Vb    | 28N    | ND2      | 3.53   |            |           | 1         | 1            |     |             |
| A          | 61Q     | CD        | Vb    | 29N    | CG       | 4.49   |            | 1         |           | 1            |     |             |

|   |     |     |    |      |     |      |   |   |   |
|---|-----|-----|----|------|-----|------|---|---|---|
| A | 61Q | CD  | Vb | 29N  | ND2 | 4.36 |   | 1 | 1 |
| A | 61Q | CD  | Vb | 29N  | OD1 | 3.78 |   | 1 | 1 |
| A | 61Q | CG  | Vb | 28N  | ND2 | 4.44 |   | 1 | 1 |
| A | 61Q | NE2 | Vb | 28N  | ND2 | 4.43 |   | 1 | 1 |
| A | 61Q | NE2 | Vb | 29N  | CG  | 4.35 |   | 1 | 1 |
| A | 61Q | NE2 | Vb | 29N  | OD1 | 3.47 | 1 |   | 1 |
| A | 61Q | NE2 | Vb | 48Y  | CB  | 4.41 |   | 1 | 1 |
| A | 61Q | NE2 | Vb | 48Y  | CD1 | 3.65 |   | 1 | 1 |
| A | 61Q | NE2 | Vb | 48Y  | CE1 | 4.16 |   | 1 | 1 |
| A | 61Q | NE2 | Vb | 48Y  | CG  | 4.18 |   | 1 | 1 |
| A | 61Q | O   | Vb | 28N  | ND2 | 4.28 |   | 1 | 1 |
| A | 61Q | OE1 | Vb | 28N  | CB  | 4.05 |   | 1 | 1 |
| A | 61Q | OE1 | Vb | 28N  | CG  | 3.38 |   | 1 | 1 |
| A | 61Q | OE1 | Vb | 28N  | ND2 | 2.38 | 1 |   | 1 |
| A | 61Q | OE1 | Vb | 28N  | OD1 | 4.19 |   | 1 | 1 |
| A | 61Q | OE1 | Vb | 29N  | CG  | 3.91 |   | 1 | 1 |
| A | 61Q | OE1 | Vb | 29N  | ND2 | 3.67 |   | 1 | 1 |
| A | 61Q | OE1 | Vb | 29N  | OD1 | 3.31 | 1 |   | 1 |
| A | 64A | CB  | Vb | 28N  | CG  | 3.62 |   | 1 | 1 |
| A | 64A | CB  | Vb | 28N  | ND2 | 3.47 |   | 1 | 1 |
| A | 64A | CB  | Vb | 28N  | OD1 | 3.32 |   | 1 | 1 |
| A | 64A | O   | Vb | 94L  | CD2 | 4.45 |   | 1 | 1 |
| A | 65A | CA  | Vb | 94L  | CB  | 3.96 |   | 1 | 1 |
| A | 65A | CB  | Vb | 94L  | CA  | 4.10 |   | 1 | 1 |
| A | 65A | CB  | Vb | 94L  | CB  | 3.93 |   | 1 | 1 |
| A | 68H | CB  | Vb | 94L  | CD2 | 3.73 |   | 1 | 1 |
| A | 68H | CD2 | Vb | 94L  | CD2 | 4.14 |   | 1 | 1 |
| A | 68H | CE1 | Vb | 26N  | CB  | 3.85 |   | 1 | 1 |
| A | 68H | CE1 | Vb | 26N  | CG  | 3.79 |   | 1 | 1 |
| A | 68H | CE1 | Vb | 26N  | OD1 | 3.68 |   | 1 | 1 |
| A | 68H | CE1 | Vb | 94L  | CD1 | 4.45 |   | 1 | 1 |
| A | 68H | CE1 | Vb | 94L  | CD2 | 3.89 |   | 1 | 1 |
| A | 68H | CG  | Vb | 94L  | CD2 | 3.50 |   | 1 | 1 |
| A | 68H | ND1 | Vb | 26N  | CB  | 4.03 |   | 1 | 1 |
| A | 68H | ND1 | Vb | 26N  | CG  | 3.56 |   | 1 | 1 |
| A | 68H | ND1 | Vb | 26N  | ND2 | 3.97 |   | 1 | 1 |
| A | 68H | ND1 | Vb | 26N  | OD1 | 3.52 |   | 1 | 1 |
| A | 68H | ND1 | Vb | 94L  | CD2 | 3.32 |   | 1 | 1 |
| A | 68H | NE2 | Vb | 94L  | CD2 | 4.35 |   | 1 | 1 |
| B | 64Q | CD  | Vb | 100Y | OH  | 4.35 |   | 1 | 1 |
| B | 64Q | NE2 | Vb | 100Y | CZ  | 4.49 |   | 1 | 1 |
| B | 64Q | NE2 | Vb | 100Y | OH  | 3.21 | 1 |   | 1 |
| B | 64Q | O   | Vb | 96G  | O   | 4.48 |   | 1 | 1 |
| B | 64Q | OE1 | Vb | 96G  | O   | 4.32 |   | 1 | 1 |
| B | 67Y | CD1 | Vb | 96G  | O   | 3.87 |   | 1 | 1 |
| B | 67Y | CE1 | Vb | 95G  | N   | 4.15 |   | 1 | 1 |
| B | 67Y | CE1 | Vb | 95G  | O   | 4.21 |   | 1 | 1 |

|   |     |     |    |     |     |      |   |   |   |
|---|-----|-----|----|-----|-----|------|---|---|---|
| B | 67Y | CE1 | Vb | 96G | O   | 3.53 |   | 1 | 1 |
| B | 67Y | CZ  | Vb | 95G | N   | 4.44 |   | 1 | 1 |
| B | 67Y | OH  | Vb | 94L | C   | 4.09 |   | 1 | 1 |
| B | 67Y | OH  | Vb | 94L | O   | 3.41 | 1 |   | 1 |
| B | 67Y | OH  | Vb | 95G | N   | 3.89 |   | 1 | 1 |
| B | 69E | CB  | Va | 50R | NH2 | 4.49 |   | 1 | 1 |
| B | 69E | CD  | Va | 56K | CE  | 4.17 | 1 |   | 1 |
| B | 69E | CD  | Va | 56K | NZ  | 3.73 |   | 1 | 1 |
| B | 69E | CG  | Va | 50R | CZ  | 4.48 | 1 |   | 1 |
| B | 69E | CG  | Va | 50R | NE  | 4.07 |   | 1 | 1 |
| B | 69E | CG  | Va | 50R | NH2 | 4.00 |   | 1 | 1 |
| B | 69E | OE1 | Va | 48D | OD1 | 3.80 |   | 1 | 1 |
| B | 69E | OE1 | Va | 56K | CD  | 4.08 |   | 1 | 1 |
| B | 69E | OE1 | Va | 56K | CE  | 3.32 |   | 1 | 1 |
| B | 69E | OE1 | Va | 56K | NZ  | 2.60 | 1 |   | 1 |
| B | 69E | OE2 | Va | 56K | CE  | 4.35 |   | 1 | 1 |
| B | 69E | OE2 | Va | 56K | NZ  | 4.32 |   | 1 | 1 |
| B | 70R | C   | Va | 94R | NH2 | 4.22 |   | 1 | 1 |
| B | 70R | CA  | Va | 50R | CD  | 3.95 | 1 |   | 1 |
| B | 70R | CA  | Va | 50R | CZ  | 3.62 | 1 |   | 1 |
| B | 70R | CA  | Va | 50R | NE  | 3.64 |   | 1 | 1 |
| B | 70R | CA  | Va | 50R | NH1 | 3.84 |   | 1 | 1 |
| B | 70R | CA  | Va | 50R | NH2 | 4.04 |   | 1 | 1 |
| B | 70R | CA  | Va | 94R | NH2 | 4.12 |   | 1 | 1 |
| B | 70R | CB  | Va | 50R | CD  | 4.46 | 1 |   | 1 |
| B | 70R | CB  | Va | 50R | CZ  | 3.25 | 1 |   | 1 |
| B | 70R | CB  | Va | 50R | NE  | 3.82 |   | 1 | 1 |
| B | 70R | CB  | Va | 50R | NH1 | 3.28 |   | 1 | 1 |
| B | 70R | CB  | Va | 50R | NH2 | 3.37 |   | 1 | 1 |
| B | 70R | CB  | Va | 94R | NH2 | 4.45 |   | 1 | 1 |
| B | 70R | CB  | Vb | 97D | OD1 | 4.32 |   | 1 | 1 |
| B | 70R | CD  | Va | 94R | NH2 | 4.37 |   | 1 | 1 |
| B | 70R | CD  | Vb | 97D | OD1 | 4.41 |   | 1 | 1 |
| B | 70R | CG  | Va | 50R | CZ  | 3.86 | 1 |   | 1 |
| B | 70R | CG  | Va | 50R | NH1 | 3.34 |   | 1 | 1 |
| B | 70R | CG  | Va | 50R | NH2 | 4.17 |   | 1 | 1 |
| B | 70R | CG  | Va | 94R | NH2 | 3.80 |   | 1 | 1 |
| B | 70R | CG  | Vb | 97D | OD1 | 3.48 |   | 1 | 1 |
| B | 70R | CZ  | Vb | 95G | O   | 4.29 |   | 1 | 1 |
| B | 70R | N   | Va | 50R | CD  | 4.15 |   | 1 | 1 |
| B | 70R | N   | Va | 50R | CZ  | 3.86 |   | 1 | 1 |
| B | 70R | N   | Va | 50R | NE  | 3.61 |   | 1 | 1 |
| B | 70R | N   | Va | 50R | NH2 | 4.02 |   | 1 | 1 |
| B | 70R | NE  | Vb | 95G | O   | 4.47 |   | 1 | 1 |
| B | 70R | NE  | Vb | 97D | OD1 | 4.16 |   | 1 | 1 |
| B | 70R | NH1 | Vb | 95G | C   | 4.44 |   | 1 | 1 |
| B | 70R | NH1 | Vb | 95G | O   | 3.31 | 1 |   | 1 |

|   |     |     |    |     |     |      |   |   |   |
|---|-----|-----|----|-----|-----|------|---|---|---|
| B | 70R | O   | Va | 94R | CZ  | 4.37 |   | 1 | 1 |
| B | 70R | O   | Va | 94R | NH2 | 3.42 | 1 |   | 1 |
| B | 73A | C   | Va | 94R | NH1 | 4.21 |   | 1 | 1 |
| B | 73A | CA  | Va | 52N | CB  | 4.49 | 1 |   | 1 |
| B | 73A | CA  | Va | 52N | CG  | 4.14 | 1 |   | 1 |
| B | 73A | CA  | Va | 52N | ND2 | 3.63 |   | 1 | 1 |
| B | 73A | CA  | Va | 94R | NH1 | 4.35 |   | 1 | 1 |
| B | 73A | CB  | Va | 50R | CD  | 4.02 | 1 |   | 1 |
| B | 73A | CB  | Va | 52N | CB  | 3.97 | 1 |   | 1 |
| B | 73A | CB  | Va | 52N | CG  | 4.03 | 1 |   | 1 |
| B | 73A | CB  | Va | 52N | ND2 | 3.49 |   | 1 | 1 |
| B | 73A | CB  | Va | 94R | CZ  | 4.18 | 1 |   | 1 |
| B | 73A | CB  | Va | 94R | NH1 | 3.27 |   | 1 | 1 |
| B | 73A | CB  | Va | 94R | NH2 | 4.38 |   | 1 | 1 |
| B | 73A | N   | Va | 52N | ND2 | 4.14 |   | 1 | 1 |
| B | 73A | O   | Va | 94R | NH1 | 4.23 |   | 1 | 1 |
| B | 74E | CG  | Va | 94R | NH2 | 4.49 |   | 1 | 1 |
| B | 76D | CB  | Va | 52N | OD1 | 4.28 |   | 1 | 1 |
| B | 76D | OD2 | Va | 52N | OD1 | 3.90 |   | 1 | 1 |
| B | 77T | CB  | Va | 94R | CD  | 3.85 | 1 |   | 1 |
| B | 77T | CB  | Va | 94R | CZ  | 3.85 | 1 |   | 1 |
| B | 77T | CB  | Va | 94R | NE  | 3.31 |   | 1 | 1 |
| B | 77T | CB  | Va | 94R | NH1 | 3.95 |   | 1 | 1 |
| B | 77T | CG2 | Va | 51S | OG  | 4.10 |   | 1 | 1 |
| B | 77T | CG2 | Va | 52N | N   | 4.45 |   | 1 | 1 |
| B | 77T | CG2 | Va | 94R | CZ  | 3.80 | 1 |   | 1 |
| B | 77T | CG2 | Va | 94R | NE  | 3.58 |   | 1 | 1 |
| B | 77T | CG2 | Va | 94R | NH1 | 3.38 |   | 1 | 1 |
| B | 77T | OG1 | Va | 94R | CD  | 3.28 |   | 1 | 1 |
| B | 77T | OG1 | Va | 94R | CZ  | 3.24 |   | 1 | 1 |
| B | 77T | OG1 | Va | 94R | NE  | 2.93 | 1 |   | 1 |
| B | 77T | OG1 | Va | 94R | NH1 | 3.61 |   | 1 | 1 |
| B | 77T | OG1 | Va | 94R | NH2 | 3.89 |   | 1 | 1 |
| P | -1E | OE1 | Va | 93R | CD  | 3.41 |   | 1 | 1 |
| P | -1E | OE1 | Va | 93R | NE  | 4.08 |   | 1 | 1 |
| P | -1E | OE1 | Va | 96S | O   | 4.21 |   | 1 | 1 |
| P | -1E | OE2 | Va | 96S | CB  | 3.96 |   | 1 | 1 |
| P | -1E | OE2 | Va | 96S | OG  | 3.70 |   | 1 | 1 |
| P | 1R  | O   | Va | 96S | CB  | 3.96 |   | 1 | 1 |
| P | 1R  | O   | Va | 96S | OG  | 4.35 |   | 1 | 1 |
| P | 2L  | C   | Va | 96S | CB  | 4.31 | 1 |   | 1 |
| P | 2L  | C   | Va | 96S | N   | 4.46 |   | 1 | 1 |
| P | 2L  | CA  | Va | 96S | CB  | 3.84 | 1 |   | 1 |
| P | 2L  | CA  | Va | 96S | N   | 4.07 |   | 1 | 1 |
| P | 2L  | CB  | Va | 96S | N   | 3.94 |   | 1 | 1 |
| P | 2L  | CD1 | Va | 30N | ND2 | 4.46 |   | 1 | 1 |
| P | 2L  | CD2 | Va | 96S | C   | 4.34 | 1 |   | 1 |

|        |    |     |    |      |     |      |    |    |     |    |    |     |
|--------|----|-----|----|------|-----|------|----|----|-----|----|----|-----|
| P      | 2L | CD2 | Va | 96S  | CA  | 4.17 |    | 1  |     |    | 1  |     |
| P      | 2L | CD2 | Va | 96S  | CB  | 3.88 |    | 1  |     |    | 1  |     |
| P      | 2L | CD2 | Va | 96S  | N   | 3.74 |    |    | 1   |    | 1  |     |
| P      | 2L | CD2 | Va | 96S  | O   | 4.00 |    |    | 1   |    | 1  |     |
| P      | 2L | CG  | Va | 96S  | N   | 4.26 |    |    | 1   |    | 1  |     |
| P      | 3Y | CB  | Va | 96S  | CB  | 4.46 |    | 1  |     |    | 1  |     |
| P      | 3Y | CD2 | Va | 96S  | CA  | 3.34 |    | 1  |     |    | 1  |     |
| P      | 3Y | CD2 | Va | 96S  | CB  | 2.97 |    | 1  |     |    | 1  |     |
| P      | 3Y | CD2 | Va | 96S  | N   | 3.95 |    |    | 1   |    | 1  |     |
| P      | 3Y | CD2 | Va | 96S  | OG  | 3.12 |    |    | 1   |    | 1  |     |
| P      | 3Y | CE2 | Va | 96S  | C   | 4.15 |    | 1  |     |    | 1  |     |
| P      | 3Y | CE2 | Va | 96S  | CA  | 3.15 |    | 1  |     |    | 1  |     |
| P      | 3Y | CE2 | Va | 96S  | CB  | 3.25 |    | 1  |     |    | 1  |     |
| P      | 3Y | CE2 | Va | 96S  | N   | 4.01 |    |    | 1   |    | 1  |     |
| P      | 3Y | CE2 | Va | 96S  | OG  | 3.14 |    |    | 1   |    | 1  |     |
| P      | 3Y | CE2 | Va | 97G  | N   | 3.95 |    |    | 1   |    | 1  |     |
| P      | 3Y | CE2 | Va | 97G  | O   | 4.28 |    |    | 1   |    | 1  |     |
| P      | 3Y | CG  | Va | 96S  | CA  | 4.10 |    | 1  |     |    | 1  |     |
| P      | 3Y | CG  | Va | 96S  | CB  | 3.87 |    | 1  |     |    | 1  |     |
| P      | 3Y | CG  | Va | 96S  | N   | 4.25 |    |    | 1   |    | 1  |     |
| P      | 3Y | CG  | Va | 96S  | OG  | 4.34 |    |    | 1   |    | 1  |     |
| P      | 3Y | CZ  | Va | 96S  | CA  | 3.81 |    | 1  |     |    | 1  |     |
| P      | 3Y | CZ  | Va | 96S  | CB  | 4.32 |    | 1  |     |    | 1  |     |
| P      | 3Y | CZ  | Va | 96S  | N   | 4.38 |    |    | 1   |    | 1  |     |
| P      | 3Y | CZ  | Va | 96S  | OG  | 4.39 |    |    | 1   |    | 1  |     |
| P      | 3Y | N   | Va | 96S  | CA  | 4.27 |    |    | 1   |    | 1  |     |
| P      | 3Y | N   | Va | 96S  | CB  | 3.67 |    |    | 1   |    | 1  |     |
| P      | 3Y | N   | Va | 96S  | N   | 3.79 |    |    | 1   |    | 1  |     |
| P      | 3Y | O   | Va | 95G  | C   | 3.93 |    |    | 1   |    | 1  |     |
| P      | 3Y | O   | Va | 95G  | O   | 3.41 | 1  |    |     |    | 1  |     |
| P      | 3Y | O   | Va | 96S  | N   | 3.89 |    |    | 1   |    | 1  |     |
| P      | 3Y | OH  | Va | 101Y | CE1 | 4.50 |    |    | 1   |    | 1  |     |
| P      | 3Y | OH  | Va | 96S  | CA  | 4.36 |    |    | 1   |    | 1  |     |
| P      | 5V | CG1 | vb | 95G  | O   | 3.98 |    |    | 1   |    | 1  |     |
| P      | 5V | CG2 | Va | 95G  | O   | 4.33 |    |    | 1   |    | 1  |     |
| P      | 6C | O   | vb | 95G  | CA  | 4.16 |    |    | 1   |    | 1  |     |
| P      | 6C | O   | vb | 95G  | N   | 4.36 |    |    | 1   |    | 1  |     |
| P      | 8G | C   | vb | 94L  | O   | 4.14 |    |    | 1   |    | 1  |     |
| P      | 8G | CA  | vb | 94L  | C   | 3.82 |    | 1  |     |    | 1  |     |
| P      | 8G | CA  | vb | 94L  | CB  | 4.32 |    | 1  |     |    | 1  |     |
| P      | 8G | CA  | vb | 94L  | O   | 3.17 |    |    | 1   |    | 1  |     |
| P      | 8G | CA  | vb | 95G  | N   | 4.31 |    |    | 1   |    | 1  |     |
| P      | 8G | N   | vb | 94L  | C   | 3.59 |    |    | 1   |    | 1  |     |
| P      | 8G | N   | vb | 94L  | O   | 3.26 | 1  |    |     |    | 1  |     |
| P      | 8G | N   | vb | 95G  | N   | 3.61 |    |    | 1   |    | 1  |     |
| Totals |    |     |    |      |     |      | 11 | 58 | 159 | 81 | 59 | 88  |
|        |    |     |    |      |     |      |    |    | 228 |    |    | 228 |

Contacts of T1D3 TCR with DQ8-8E9E11ss

| TCR V  | TCR AA | TCR atom | pMHC Chain | pMHC AA | pMHC atom | dist Å | Hbond salt | VDW C-C | VDW other | MHCa | PEP | MHCb |
|--------|--------|----------|------------|---------|-----------|--------|------------|---------|-----------|------|-----|------|
| Va 26T | C      | C        | P          | -1E     | CD        | 4.20   |            | 1       |           |      | 1   |      |
| Va 26T | C      | C        | P          | -1E     | OE1       | 3.47   |            |         | 1         |      | 1   |      |
| Va 26T | C      | C        | P          | -1E     | OE2       | 4.13   |            |         | 1         |      | 1   |      |
| Va 26T | CA     | CA       | P          | -1E     | CD        | 4.16   |            | 1       |           |      | 1   |      |
| Va 26T | CA     | CA       | P          | -1E     | OE1       | 3.28   |            |         | 1         |      | 1   |      |
| Va 26T | CA     | CA       | P          | -1E     | OE2       | 4.24   |            |         | 1         |      | 1   |      |
| Va 26T | CB     | CB       | P          | -1E     | CD        | 4.33   |            | 1       |           |      | 1   |      |
| Va 26T | CB     | CB       | P          | -1E     | OE1       | 3.15   |            |         | 1         |      | 1   |      |
| Va 26T | CG2    | CG2      | P          | -1E     | OE1       | 4.09   |            |         | 1         |      | 1   |      |
| Va 26T | OG1    | OG1      | P          | -1E     | OE1       | 4.12   |            |         | 1         |      | 1   |      |
| Va 27S | CA     | CA       | P          | -1E     | CD        | 4.32   |            | 1       |           |      | 1   |      |
| Va 27S | CA     | CA       | P          | -1E     | OE1       | 3.92   |            |         | 1         |      | 1   |      |
| Va 27S | CA     | CA       | P          | -1E     | OE2       | 4.28   |            |         | 1         |      | 1   |      |
| Va 27S | CB     | CB       | B          | 81H     | CE1       | 3.88   |            | 1       |           |      |     | 1    |
| Va 27S | CB     | CB       | B          | 81H     | NE2       | 4.24   |            |         | 1         |      |     | 1    |
| Va 27S | CB     | CB       | P          | -1E     | CB        | 4.50   |            | 1       |           |      | 1   |      |
| Va 27S | CB     | CB       | P          | -1E     | CD        | 4.05   |            | 1       |           |      | 1   |      |
| Va 27S | CB     | CB       | P          | -1E     | O         | 4.16   |            |         | 1         |      | 1   |      |
| Va 27S | CB     | CB       | P          | -1E     | OE1       | 4.01   |            |         | 1         |      | 1   |      |
| Va 27S | CB     | CB       | P          | -1E     | OE2       | 4.00   |            |         | 1         |      | 1   |      |
| Va 27S | CB     | CB       | P          | 2L      | CD1       | 4.35   |            | 1       |           |      | 1   |      |
| Va 27S | CB     | CB       | P          | 2L      | CD2       | 4.34   |            | 1       |           |      | 1   |      |
| Va 27S | N      | N        | P          | -1E     | CD        | 3.39   |            |         | 1         |      | 1   |      |
| Va 27S | N      | N        | P          | -1E     | OE1       | 2.81   | 1          |         |           |      | 1   |      |
| Va 27S | N      | N        | P          | -1E     | OE2       | 3.40   | 1          |         |           |      | 1   |      |
| Va 27S | O      | O        | P          | -1E     | OE1       | 4.30   |            |         | 1         |      | 1   |      |
| Va 27S | OG     | OG       | B          | 81H     | CE1       | 3.44   |            |         | 1         |      |     | 1    |
| Va 27S | OG     | OG       | P          | -1E     | CB        | 4.33   |            |         | 1         |      | 1   |      |
| Va 27S | OG     | OG       | P          | -1E     | CD        | 3.79   |            |         | 1         |      | 1   |      |
| Va 27S | OG     | OG       | P          | -1E     | O         | 3.77   |            |         | 1         |      | 1   |      |
| Va 27S | OG     | OG       | P          | -1E     | OE1       | 4.17   |            |         | 1         |      | 1   |      |
| Va 27S | OG     | OG       | P          | -1E     | OE2       | 3.33   | 1          |         |           |      | 1   |      |
| Va 28I | C      | C        | P          | 2L      | CD1       | 4.45   |            | 1       |           |      | 1   |      |
| Va 28I | O      | O        | P          | 2L      | CD1       | 3.98   |            |         | 1         |      | 1   |      |
| Va 29N | CB     | CB       | B          | 77T     | OG1       | 4.41   |            |         | 1         |      |     | 1    |
| Va 29N | CG     | CG       | B          | 77T     | CB        | 4.35   |            | 1       |           |      |     | 1    |
| Va 29N | CG     | CG       | B          | 77T     | OG1       | 4.03   |            |         | 1         |      |     | 1    |
| Va 29N | ND2    | ND2      | B          | 77T     | C         | 4.03   |            |         | 1         |      |     | 1    |
| Va 29N | ND2    | ND2      | B          | 77T     | CA        | 4.26   |            |         | 1         |      |     | 1    |
| Va 29N | ND2    | ND2      | B          | 77T     | CB        | 3.23   |            |         | 1         |      |     | 1    |
| Va 29N | ND2    | ND2      | B          | 77T     | CG2       | 4.29   |            |         | 1         |      |     | 1    |
| Va 29N | ND2    | ND2      | B          | 77T     | O         | 3.83   |            |         | 1         |      |     | 1    |



|            |   |          |      |   |   |   |
|------------|---|----------|------|---|---|---|
| Va 29N ND2 | B | 77T OG1  | 2.87 | 1 |   | 1 |
| Va 29N ND2 | B | 78V CG2  | 3.70 |   | 1 | 1 |
| Va 29N ND2 | B | 81H NE2  | 3.90 |   | 1 | 1 |
| Va 29N ND2 | P | 199V CA  | 4.47 |   | 1 | 1 |
| Va 29N ND2 | P | 199V CG1 | 3.46 |   | 1 | 1 |
| Va 29N ND2 | P | -1E CA   | 4.43 |   | 1 | 1 |
| Va 29N ND2 | P | -1E N    | 3.74 |   | 1 | 1 |
| Va 29N ND2 | P | 2L CD1   | 4.15 |   | 1 | 1 |
| Va 29N O   | B | 77T CG2  | 4.41 |   | 1 | 1 |
| Va 29N OD1 | P | 2L CD1   | 4.39 |   | 1 | 1 |
| Va 29N OD1 | P | 2L CD2   | 4.32 |   | 1 | 1 |
| Va 47L CD1 | B | 66E OE2  | 4.18 |   | 1 | 1 |
| Va 47L CD2 | B | 69E OE2  | 4.35 |   | 1 | 1 |
| Va 49R CD  | B | 69E CD   | 4.21 | 1 |   | 1 |
| Va 49R CD  | B | 69E CG   | 3.93 | 1 |   | 1 |
| Va 49R CD  | B | 69E O    | 4.17 |   | 1 | 1 |
| Va 49R CD  | B | 69E OE2  | 3.75 |   | 1 | 1 |
| Va 49R CD  | B | 73A CB   | 3.96 | 1 |   | 1 |
| Va 49R CG  | B | 69E OE2  | 4.13 |   | 1 | 1 |
| Va 49R CZ  | B | 69E C    | 4.34 | 1 |   | 1 |
| Va 49R CZ  | B | 69E CD   | 3.72 | 1 |   | 1 |
| Va 49R CZ  | B | 69E CG   | 3.51 | 1 |   | 1 |
| Va 49R CZ  | B | 69E OE1  | 4.27 |   | 1 | 1 |
| Va 49R CZ  | B | 69E OE2  | 3.90 |   | 1 | 1 |
| Va 49R CZ  | B | 70R CA   | 3.80 | 1 |   | 1 |
| Va 49R CZ  | B | 70R CB   | 4.16 | 1 |   | 1 |
| Va 49R CZ  | B | 70R N    | 3.91 |   | 1 | 1 |
| Va 49R NE  | B | 69E C    | 4.18 |   | 1 | 1 |
| Va 49R NE  | B | 69E CB   | 4.44 |   | 1 | 1 |
| Va 49R NE  | B | 69E CD   | 3.14 |   | 1 | 1 |
| Va 49R NE  | B | 69E CG   | 3.00 |   | 1 | 1 |
| Va 49R NE  | B | 69E O    | 4.16 |   | 1 | 1 |
| Va 49R NE  | B | 69E OE1  | 4.02 |   | 1 | 1 |
| Va 49R NE  | B | 69E OE2  | 2.99 | 1 |   | 1 |
| Va 49R NE  | B | 70R CA   | 4.29 |   | 1 | 1 |
| Va 49R NE  | B | 70R N    | 4.16 |   | 1 | 1 |
| Va 49R NH1 | B | 70R CA   | 3.70 |   | 1 | 1 |
| Va 49R NH1 | B | 70R CB   | 3.88 |   | 1 | 1 |
| Va 49R NH1 | B | 70R CG   | 4.09 |   | 1 | 1 |
| Va 49R NH1 | B | 70R N    | 4.29 |   | 1 | 1 |
| Va 49R NH2 | B | 66E CG   | 4.07 |   | 1 | 1 |
| Va 49R NH2 | B | 66E O    | 3.59 |   | 1 | 1 |
| Va 49R NH2 | B | 69E CD   | 3.39 |   | 1 | 1 |
| Va 49R NH2 | B | 69E CG   | 3.36 |   | 1 | 1 |
| Va 49R NH2 | B | 69E OE1  | 3.54 |   | 1 | 1 |
| Va 49R NH2 | B | 69E OE2  | 3.90 | 1 |   | 1 |
| Va 49R NH2 | B | 70R CA   | 4.06 |   | 1 | 1 |

|            |   |         |      |   |   |   |
|------------|---|---------|------|---|---|---|
| Va 49R NH2 | B | 70R CB  | 4.11 |   | 1 | 1 |
| Va 49R NH2 | B | 70R N   | 3.92 |   | 1 | 1 |
| Va 50S CB  | B | 77T CG2 | 4.40 | 1 |   | 1 |
| Va 50S N   | B | 77T CG2 | 4.42 |   | 1 | 1 |
| Va 50S OG  | B | 77T CA  | 4.11 |   | 1 | 1 |
| Va 50S OG  | B | 77T CB  | 3.49 |   | 1 | 1 |
| Va 50S OG  | B | 77T CG2 | 3.14 |   | 1 | 1 |
| Va 51N CB  | B | 76D CB  | 3.67 | 1 |   | 1 |
| Va 51N CB  | B | 76D CG  | 4.15 | 1 |   | 1 |
| Va 51N CB  | B | 76D OD2 | 3.80 |   | 1 | 1 |
| Va 51N CB  | B | 77T CG2 | 4.35 | 1 |   | 1 |
| Va 51N CG  | B | 73A CB  | 4.12 | 1 |   | 1 |
| Va 51N CG  | B | 76D CB  | 4.17 | 1 |   | 1 |
| Va 51N CG  | B | 76D OD2 | 3.95 |   | 1 | 1 |
| Va 51N CG  | B | 77T CG2 | 4.32 | 1 |   | 1 |
| Va 51N N   | B | 77T CG2 | 4.10 |   | 1 | 1 |
| Va 51N ND2 | B | 73A CA  | 3.97 |   | 1 | 1 |
| Va 51N ND2 | B | 73A CB  | 3.73 |   | 1 | 1 |
| Va 51N ND2 | B | 73A O   | 4.19 |   | 1 | 1 |
| Va 51N ND2 | B | 76D CB  | 3.84 |   | 1 | 1 |
| Va 51N ND2 | B | 76D CG  | 3.92 |   | 1 | 1 |
| Va 51N ND2 | B | 76D OD2 | 3.14 | 1 |   | 1 |
| Va 51N OD1 | B | 73A CB  | 3.93 |   | 1 | 1 |
| Va 51N OD1 | B | 77T CG2 | 4.34 |   | 1 | 1 |
| Va 92A C   | A | 58F CZ  | 4.37 | 1 |   | 1 |
| Va 92A O   | A | 58F CE1 | 3.79 |   | 1 | 1 |
| Va 92A O   | A | 58F CZ  | 3.39 |   | 1 | 1 |
| Va 93G C   | A | 58F CE1 | 3.87 | 1 |   | 1 |
| Va 93G C   | A | 58F CE2 | 4.37 | 1 |   | 1 |
| Va 93G C   | A | 58F CZ  | 3.69 | 1 |   | 1 |
| Va 93G C   | P | 2L CD2  | 4.39 | 1 |   | 1 |
| Va 93G C   | P | 3Y CE1  | 4.31 | 1 |   | 1 |
| Va 93G CA  | A | 58F CE1 | 4.46 | 1 |   | 1 |
| Va 93G CA  | A | 58F CZ  | 3.88 | 1 |   | 1 |
| Va 93G CA  | P | 2L CD2  | 3.60 | 1 |   | 1 |
| Va 93G O   | A | 58F CE1 | 4.09 |   | 1 | 1 |
| Va 93G O   | A | 58F CE2 | 4.18 |   | 1 | 1 |
| Va 93G O   | A | 58F CZ  | 3.86 |   | 1 | 1 |
| Va 93G O   | P | 2L CD2  | 4.13 |   | 1 | 1 |
| Va 93G O   | P | 3Y CD1  | 3.87 |   | 1 | 1 |
| Va 93G O   | P | 3Y CE1  | 3.36 |   | 1 | 1 |
| Va 93G O   | P | 3Y CZ   | 4.44 |   | 1 | 1 |
| Va 94Y C   | P | 3Y CE1  | 3.98 | 1 |   | 1 |
| Va 94Y C   | P | 3Y CZ   | 4.16 | 1 |   | 1 |
| Va 94Y C   | P | 3Y OH   | 3.51 |   | 1 | 1 |
| Va 94Y CA  | A | 58F CD1 | 4.24 | 1 |   | 1 |
| Va 94Y CA  | A | 58F CE1 | 3.93 | 1 |   | 1 |

|            |   |         |      |   |   |   |   |
|------------|---|---------|------|---|---|---|---|
| Va 94Y CA  | P | 3Y CE1  | 4.04 |   | 1 |   | 1 |
| Va 94Y CA  | P | 3Y CZ   | 4.44 |   | 1 |   | 1 |
| Va 94Y CA  | P | 3Y OH   | 3.83 |   |   | 1 | 1 |
| Va 94Y CD1 | A | 58F CD1 | 3.99 |   | 1 |   | 1 |
| Va 94Y CD1 | A | 58F CE1 | 4.13 |   | 1 |   | 1 |
| Va 94Y CD1 | A | 61T OG1 | 3.93 |   |   | 1 | 1 |
| Va 94Y CD2 | A | 58F CE1 | 3.96 |   | 1 |   | 1 |
| Va 94Y CE1 | A | 57Q CB  | 4.45 |   | 1 |   | 1 |
| Va 94Y CE1 | A | 57Q CG  | 3.74 |   | 1 |   | 1 |
| Va 94Y CE1 | A | 57Q O   | 4.45 |   |   | 1 | 1 |
| Va 94Y CE1 | A | 58F CD1 | 4.14 |   | 1 |   | 1 |
| Va 94Y CE1 | A | 58F CE1 | 4.32 |   | 1 |   | 1 |
| Va 94Y CE1 | A | 61T OG1 | 3.77 |   |   | 1 | 1 |
| Va 94Y CE2 | A | 58F CE1 | 4.14 |   | 1 |   | 1 |
| Va 94Y CG  | A | 58F CD1 | 4.26 |   | 1 |   | 1 |
| Va 94Y CG  | A | 58F CE1 | 3.98 |   | 1 |   | 1 |
| Va 94Y CZ  | A | 57Q CB  | 4.42 |   | 1 |   | 1 |
| Va 94Y CZ  | A | 57Q CG  | 3.86 |   | 1 |   | 1 |
| Va 94Y CZ  | A | 58F CE1 | 4.32 |   | 1 |   | 1 |
| Va 94Y N   | A | 58F CE1 | 3.80 |   |   | 1 | 1 |
| Va 94Y N   | A | 58F CZ  | 4.05 |   |   | 1 | 1 |
| Va 94Y O   | P | 3Y CE1  | 3.43 |   |   | 1 | 1 |
| Va 94Y O   | P | 3Y CE2  | 4.43 |   |   | 1 | 1 |
| Va 94Y O   | P | 3Y CZ   | 3.28 |   |   | 1 | 1 |
| Va 94Y O   | P | 3Y OH   | 2.55 | 1 |   |   | 1 |
| Va 94Y O   | P | 5V CG2  | 3.66 |   |   | 1 | 1 |
| Va 94Y OH  | A | 55D OD2 | 4.25 |   |   | 1 | 1 |
| Va 94Y OH  | A | 57Q CB  | 3.68 |   |   | 1 | 1 |
| Va 94Y OH  | A | 57Q CD  | 4.43 |   |   | 1 | 1 |
| Va 94Y OH  | A | 57Q CG  | 3.11 |   |   | 1 | 1 |
| Va 95N C   | B | 70R CD  | 4.36 |   | 1 |   | 1 |
| Va 95N C   | B | 70R NH1 | 4.17 |   |   | 1 | 1 |
| Va 95N C   | P | 5V CG2  | 4.17 |   | 1 |   | 1 |
| Va 95N CB  | B | 70R CD  | 4.27 |   | 1 |   | 1 |
| Va 95N CB  | P | 5V CG2  | 3.80 |   | 1 |   | 1 |
| Va 95N CG  | B | 70R CD  | 3.56 |   | 1 |   | 1 |
| Va 95N CG  | B | 70R CG  | 3.79 |   | 1 |   | 1 |
| Va 95N ND2 | B | 70R CD  | 3.68 |   |   | 1 | 1 |
| Va 95N ND2 | B | 70R CG  | 3.84 |   |   | 1 | 1 |
| Va 95N O   | B | 70R CD  | 3.24 |   |   | 1 | 1 |
| Va 95N O   | B | 70R CZ  | 3.84 |   |   | 1 | 1 |
| Va 95N O   | B | 70R NE  | 3.88 |   |   | 1 | 1 |
| Va 95N O   | B | 70R NH1 | 3.02 | 1 |   |   | 1 |
| Va 95N O   | P | 5V CG2  | 3.84 |   |   | 1 | 1 |
| Va 95N OD1 | B | 70R CD  | 3.57 |   |   | 1 | 1 |
| Va 95N OD1 | B | 70R CG  | 3.41 |   |   | 1 | 1 |
| Va 95N OD1 | B | 74E CG  | 4.43 |   |   | 1 | 1 |

|            |   |         |      |   |   |   |
|------------|---|---------|------|---|---|---|
| Va 95N OD1 | B | 74E OE2 | 4.43 |   | 1 | 1 |
| Va 96Q CA  | B | 70R NH1 | 4.30 |   | 1 | 1 |
| Va 96Q CB  | B | 70R NH1 | 3.93 |   | 1 | 1 |
| Va 96Q CB  | P | 5V CG1  | 4.03 | 1 |   | 1 |
| Va 96Q CB  | P | 5V CG2  | 4.35 | 1 |   | 1 |
| Va 96Q CD  | A | 61T CG2 | 3.50 | 1 | 1 |   |
| Va 96Q CD  | A | 62N OD1 | 4.01 |   | 1 | 1 |
| Va 96Q CD  | P | 3Y OH   | 3.83 |   | 1 | 1 |
| Va 96Q CD  | P | 5V CB   | 4.32 | 1 |   | 1 |
| Va 96Q CD  | P | 5V CG1  | 3.40 | 1 |   | 1 |
| Va 96Q CD  | P | 5V CG2  | 4.09 | 1 |   | 1 |
| Va 96Q CG  | A | 61T CG2 | 3.73 | 1 | 1 |   |
| Va 96Q CG  | P | 3Y OH   | 3.68 |   | 1 | 1 |
| Va 96Q CG  | P | 5V CG1  | 4.06 | 1 |   | 1 |
| Va 96Q CG  | P | 5V CG2  | 4.13 | 1 |   | 1 |
| Va 96Q NE2 | A | 61T C   | 4.33 |   | 1 | 1 |
| Va 96Q NE2 | A | 61T CB  | 4.11 |   | 1 | 1 |
| Va 96Q NE2 | A | 61T CG2 | 3.46 |   | 1 | 1 |
| Va 96Q NE2 | A | 62N CA  | 4.21 |   | 1 | 1 |
| Va 96Q NE2 | A | 62N CG  | 3.97 |   | 1 | 1 |
| Va 96Q NE2 | A | 62N N   | 4.22 |   | 1 | 1 |
| Va 96Q NE2 | A | 62N OD1 | 2.93 | 1 |   | 1 |
| Va 96Q NE2 | P | 3Y CE2  | 3.84 |   | 1 | 1 |
| Va 96Q NE2 | P | 3Y CZ   | 3.85 |   | 1 | 1 |
| Va 96Q NE2 | P | 3Y OH   | 2.99 | 1 |   | 1 |
| Va 96Q NE2 | P | 5V CA   | 4.36 |   | 1 | 1 |
| Va 96Q NE2 | P | 5V CB   | 4.05 |   | 1 | 1 |
| Va 96Q NE2 | P | 5V CG1  | 3.46 |   | 1 | 1 |
| Va 96Q NE2 | P | 5V CG2  | 3.77 |   | 1 | 1 |
| Va 96Q OE1 | A | 61T CG2 | 4.01 |   | 1 | 1 |
| Va 96Q OE1 | A | 62N OD1 | 4.29 |   | 1 | 1 |
| Va 96Q OE1 | A | 65V CG2 | 3.55 |   | 1 | 1 |
| Va 96Q OE1 | P | 5V CG1  | 3.51 |   | 1 | 1 |
| Va 96Q OE1 | P | 6A O    | 4.42 |   | 1 | 1 |
| Vb 28G O   | B | 60Y OH  | 4.12 |   | 1 | 1 |
| Vb 30R CB  | P | 8E OE1  | 4.19 |   | 1 | 1 |
| Vb 30R CD  | A | 68H CD2 | 4.49 | 1 |   | 1 |
| Vb 30R CD  | A | 68H CE1 | 3.59 | 1 |   | 1 |
| Vb 30R CD  | A | 68H ND1 | 4.40 |   | 1 | 1 |
| Vb 30R CD  | A | 68H NE2 | 3.64 |   | 1 | 1 |
| Vb 30R CD  | P | 8E OE1  | 4.06 |   | 1 | 1 |
| Vb 30R CD  | P | 9E O    | 4.40 |   | 1 | 1 |
| Vb 30R CD  | P | 11C O   | 4.03 |   | 1 | 1 |
| Vb 30R CG  | P | 8E OE1  | 4.49 |   | 1 | 1 |
| Vb 30R CZ  | A | 68H NE2 | 4.42 |   | 1 | 1 |
| Vb 30R CZ  | B | 60Y OH  | 3.71 |   | 1 | 1 |
| Vb 30R CZ  | P | 8E CB   | 4.22 | 1 |   | 1 |

|            |   |         |      |   |   |   |   |   |
|------------|---|---------|------|---|---|---|---|---|
| Vb 30R CZ  | P | 8E CD   | 4.44 |   | 1 |   | 1 |   |
| Vb 30R CZ  | P | 8E OE1  | 3.30 |   |   | 1 | 1 |   |
| Vb 30R CZ  | P | 9E C    | 4.44 |   | 1 |   | 1 |   |
| Vb 30R CZ  | P | 9E O    | 3.46 |   |   | 1 | 1 |   |
| Vb 30R CZ  | P | 10G CA  | 4.20 |   | 1 |   | 1 |   |
| Vb 30R NE  | A | 68H CE1 | 4.23 |   |   | 1 | 1 |   |
| Vb 30R NE  | A | 68H NE2 | 3.80 |   |   | 1 | 1 |   |
| Vb 30R NE  | P | 8E CB   | 4.04 |   |   | 1 |   | 1 |
| Vb 30R NE  | P | 8E CD   | 3.94 |   |   | 1 |   | 1 |
| Vb 30R NE  | P | 8E CG   | 4.40 |   |   | 1 |   | 1 |
| Vb 30R NE  | P | 8E OE1  | 2.89 | 1 |   |   |   | 1 |
| Vb 30R NE  | P | 9E O    | 3.72 |   |   | 1 |   | 1 |
| Vb 30R NH1 | B | 60Y OH  | 3.61 |   |   | 1 |   | 1 |
| Vb 30R NH1 | P | 9E O    | 3.70 |   |   | 1 |   | 1 |
| Vb 30R NH1 | P | 10G C   | 3.72 |   |   | 1 |   | 1 |
| Vb 30R NH1 | P | 10G CA  | 3.65 |   |   | 1 |   | 1 |
| Vb 30R NH1 | P | 10G O   | 3.64 |   |   | 1 |   | 1 |
| Vb 30R NH1 | P | 11C N   | 4.47 |   |   | 1 |   | 1 |
| Vb 30R NH1 | P | 11C O   | 3.93 |   |   | 1 |   | 1 |
| Vb 30R NH2 | B | 60Y CE2 | 3.99 |   |   | 1 |   | 1 |
| Vb 30R NH2 | B | 60Y CZ  | 3.92 |   |   | 1 |   | 1 |
| Vb 30R NH2 | B | 60Y OH  | 2.93 | 1 |   |   |   | 1 |
| Vb 30R NH2 | P | 8E CB   | 3.67 |   |   | 1 |   | 1 |
| Vb 30R NH2 | P | 8E CD   | 3.97 |   |   | 1 |   | 1 |
| Vb 30R NH2 | P | 8E CG   | 4.40 |   |   | 1 |   | 1 |
| Vb 30R NH2 | P | 8E O    | 4.19 |   |   | 1 |   | 1 |
| Vb 30R NH2 | P | 8E OE1  | 2.89 | 1 |   |   |   | 1 |
| Vb 30R NH2 | P | 9E C    | 4.45 |   |   | 1 |   | 1 |
| Vb 30R NH2 | P | 9E O    | 3.69 |   |   | 1 |   | 1 |
| Vb 30R NH2 | P | 10G CA  | 4.32 |   |   | 1 |   | 1 |
| Vb 31S OG  | P | 8E OE2  | 4.49 |   |   | 1 |   | 1 |
| Vb 50F CD1 | P | 8E OE2  | 4.49 |   |   | 1 |   | 1 |
| Vb 50F CD2 | A | 64A C   | 4.47 |   | 1 |   | 1 |   |
| Vb 50F CD2 | A | 64A CB  | 4.31 |   | 1 |   | 1 |   |
| Vb 50F CD2 | A | 64A O   | 4.34 |   |   | 1 | 1 |   |
| Vb 50F CE1 | P | 8E CD   | 3.67 |   | 1 |   |   | 1 |
| Vb 50F CE1 | P | 8E CG   | 4.12 |   | 1 |   |   | 1 |
| Vb 50F CE1 | P | 8E OE1  | 3.94 |   |   | 1 |   | 1 |
| Vb 50F CE1 | P | 8E OE2  | 3.67 |   |   | 1 |   | 1 |
| Vb 50F CE2 | A | 64A C   | 4.04 |   | 1 |   | 1 |   |
| Vb 50F CE2 | A | 64A O   | 3.74 |   |   | 1 | 1 |   |
| Vb 50F CE2 | A | 65V CA  | 4.08 |   | 1 |   | 1 |   |
| Vb 50F CE2 | A | 65V CG2 | 4.43 |   | 1 |   | 1 |   |
| Vb 50F CE2 | A | 65V N   | 4.18 |   |   | 1 | 1 |   |
| Vb 50F CE2 | A | 68H CB  | 3.88 |   | 1 |   | 1 |   |
| Vb 50F CE2 | A | 68H CG  | 4.33 |   | 1 |   | 1 |   |
| Vb 50F CZ  | A | 65V CA  | 4.39 |   | 1 |   | 1 |   |

|            |   |         |      |   |   |   |
|------------|---|---------|------|---|---|---|
| Vb 50F CZ  | A | 65V CG2 | 4.25 | 1 | 1 |   |
| Vb 50F CZ  | A | 68H CB  | 4.17 | 1 | 1 |   |
| Vb 50F CZ  | A | 68H CD2 | 4.39 | 1 | 1 |   |
| Vb 50F CZ  | A | 68H CG  | 4.20 | 1 | 1 |   |
| Vb 50F CZ  | P | 8E CD   | 4.14 | 1 |   | 1 |
| Vb 50F CZ  | P | 8E CG   | 4.09 | 1 |   | 1 |
| Vb 50F CZ  | P | 8E OE2  | 4.38 |   | 1 | 1 |
| Vb 51S OG  | A | 68H CB  | 3.71 |   | 1 | 1 |
| Vb 51S OG  | A | 68H CE1 | 4.31 |   | 1 | 1 |
| Vb 51S OG  | A | 68H CG  | 3.80 |   | 1 | 1 |
| Vb 51S OG  | A | 68H ND1 | 3.39 | 1 |   | 1 |
| Vb 55R C   | A | 57Q NE2 | 3.96 |   | 1 | 1 |
| Vb 55R CD  | A | 61T CA  | 4.05 | 1 |   | 1 |
| Vb 55R CD  | A | 61T CG2 | 4.28 | 1 |   | 1 |
| Vb 55R CD  | A | 61T O   | 3.97 |   | 1 | 1 |
| Vb 55R CD  | A | 64A CB  | 3.78 | 1 |   | 1 |
| Vb 55R CG  | A | 61T CA  | 4.36 | 1 |   | 1 |
| Vb 55R CG  | A | 64A CB  | 4.42 | 1 |   | 1 |
| Vb 55R CZ  | A | 61T CG2 | 3.64 | 1 |   | 1 |
| Vb 55R CZ  | A | 61T O   | 4.23 |   | 1 | 1 |
| Vb 55R NE  | A | 61T CA  | 4.49 |   | 1 | 1 |
| Vb 55R NE  | A | 61T CG2 | 3.82 |   | 1 | 1 |
| Vb 55R NE  | A | 61T O   | 4.45 |   | 1 | 1 |
| Vb 55R NH1 | A | 61T C   | 4.18 |   | 1 | 1 |
| Vb 55R NH1 | A | 61T CA  | 4.44 |   | 1 | 1 |
| Vb 55R NH1 | A | 61T CG2 | 3.66 |   | 1 | 1 |
| Vb 55R NH1 | A | 61T O   | 3.29 | 1 |   | 1 |
| Vb 55R NH1 | A | 64A CB  | 4.48 |   | 1 | 1 |
| Vb 55R NH1 | A | 65V CG2 | 3.63 |   | 1 | 1 |
| Vb 55R NH2 | A | 61T CG2 | 4.14 |   | 1 | 1 |
| Vb 55R O   | A | 57Q CD  | 3.95 |   | 1 | 1 |
| Vb 55R O   | A | 57Q NE2 | 2.87 | 1 |   | 1 |
| Vb 55R O   | A | 57Q OE1 | 4.38 |   | 1 | 1 |
| Vb 56N CA  | A | 57Q NE2 | 4.08 |   | 1 | 1 |
| Vb 56N CB  | A | 57Q NE2 | 3.95 |   | 1 | 1 |
| Vb 56N CG  | A | 57Q CD  | 3.94 | 1 |   | 1 |
| Vb 56N CG  | A | 57Q CG  | 3.96 | 1 |   | 1 |
| Vb 56N CG  | A | 57Q NE2 | 3.76 |   | 1 | 1 |
| Vb 56N N   | A | 57Q NE2 | 4.48 |   | 1 | 1 |
| Vb 56N ND2 | A | 57Q CD  | 4.05 |   | 1 | 1 |
| Vb 56N ND2 | A | 57Q CG  | 3.62 |   | 1 | 1 |
| Vb 56N ND2 | A | 57Q NE2 | 3.93 |   | 1 | 1 |
| Vb 56N OD1 | A | 57Q CD  | 3.94 |   | 1 | 1 |
| Vb 56N OD1 | A | 57Q CG  | 4.03 |   | 1 | 1 |
| Vb 56N OD1 | A | 57Q NE2 | 4.08 |   | 1 | 1 |
| Vb 56N OD1 | A | 57Q OE1 | 4.41 |   | 1 | 1 |
| Vb 95A CB  | B | 64Q NE2 | 4.06 |   | 1 | 1 |

|            |   |         |      |   |   |   |
|------------|---|---------|------|---|---|---|
| Vb 95A O   | B | 64Q NE2 | 4.43 |   | 1 | 1 |
| Vb 95A O   | B | 67V CG2 | 4.37 |   | 1 | 1 |
| Vb 95A O   | P | 8E CD   | 4.36 |   | 1 | 1 |
| Vb 95A O   | P | 8E OE1  | 4.34 |   | 1 | 1 |
| Vb 95A O   | P | 8E OE2  | 4.09 |   | 1 | 1 |
| Vb 96G C   | B | 66E OE1 | 4.25 |   | 1 | 1 |
| Vb 96G C   | B | 70R NH1 | 3.82 |   | 1 | 1 |
| Vb 96G CA  | B | 66E OE1 | 4.02 |   | 1 | 1 |
| Vb 96G CA  | B | 70R NH1 | 3.86 |   | 1 | 1 |
| Vb 96G N   | B | 66E OE1 | 4.07 |   | 1 | 1 |
| Vb 96G O   | B | 70R NH1 | 3.84 |   | 1 | 1 |
| Vb 97N C   | B | 66E CD  | 4.17 | 1 |   | 1 |
| Vb 97N C   | B | 66E OE1 | 4.43 |   | 1 | 1 |
| Vb 97N C   | B | 66E OE2 | 3.53 |   | 1 | 1 |
| Vb 97N CA  | B | 66E CD  | 4.15 | 1 |   | 1 |
| Vb 97N CA  | B | 66E OE1 | 4.40 |   | 1 | 1 |
| Vb 97N CA  | B | 66E OE2 | 3.87 |   | 1 | 1 |
| Vb 97N CB  | B | 66E CD  | 3.96 | 1 |   | 1 |
| Vb 97N CB  | B | 66E CG  | 4.34 | 1 |   | 1 |
| Vb 97N CB  | B | 66E OE2 | 3.57 |   | 1 | 1 |
| Vb 97N CG  | B | 70R CB  | 4.37 | 1 |   | 1 |
| Vb 97N CG  | B | 70R CD  | 4.10 | 1 |   | 1 |
| Vb 97N CG  | B | 70R CG  | 4.37 | 1 |   | 1 |
| Vb 97N N   | B | 66E CD  | 3.64 |   | 1 | 1 |
| Vb 97N N   | B | 66E CG  | 4.36 |   | 1 | 1 |
| Vb 97N N   | B | 66E OE1 | 3.55 |   | 1 | 1 |
| Vb 97N N   | B | 66E OE2 | 3.78 |   | 1 | 1 |
| Vb 97N ND2 | B | 70R CD  | 3.64 |   | 1 | 1 |
| Vb 97N ND2 | B | 70R CG  | 4.19 |   | 1 | 1 |
| Vb 97N ND2 | B | 70R NH1 | 4.38 |   | 1 | 1 |
| Vb 97N OD1 | B | 66E O   | 3.94 |   | 1 | 1 |
| Vb 97N OD1 | B | 70R CA  | 4.19 |   | 1 | 1 |
| Vb 97N OD1 | B | 70R CB  | 3.47 |   | 1 | 1 |
| Vb 97N OD1 | B | 70R CD  | 3.90 |   | 1 | 1 |
| Vb 97N OD1 | B | 70R CG  | 3.79 |   | 1 | 1 |
| Vb 98T C   | B | 66E OE2 | 4.36 |   | 1 | 1 |
| Vb 98T CA  | B | 66E CD  | 4.05 | 1 |   | 1 |
| Vb 98T CA  | B | 66E OE1 | 4.27 |   | 1 | 1 |
| Vb 98T CA  | B | 66E OE2 | 3.11 |   | 1 | 1 |
| Vb 98T CB  | B | 66E CD  | 3.61 | 1 |   | 1 |
| Vb 98T CB  | B | 66E OE1 | 3.91 |   | 1 | 1 |
| Vb 98T CB  | B | 66E OE2 | 2.64 |   | 1 | 1 |
| Vb 98T CG2 | B | 66E OE2 | 4.05 |   | 1 | 1 |
| Vb 98T N   | B | 66E CD  | 3.28 |   | 1 | 1 |
| Vb 98T N   | B | 66E OE1 | 3.50 | 1 |   | 1 |
| Vb 98T N   | B | 66E OE2 | 2.55 | 1 |   | 1 |
| Vb 98T OG1 | B | 66E CD  | 3.49 |   | 1 | 1 |

|            |   |         |      |    |     |     |         |     |
|------------|---|---------|------|----|-----|-----|---------|-----|
| Vb 98T OG1 | B | 66E OE1 | 4.22 |    |     | 1   |         | 1   |
| Vb 98T OG1 | B | 66E OE2 | 2.30 | 1  |     |     |         | 1   |
|            |   |         |      | 20 | 108 | 245 | 109 119 | 145 |
|            |   |         |      |    |     | 373 |         | 373 |



Contacts of DQ8-8E9E11ss with T1D TCR

| pMHC Chain | pMHC AA | pMHC atom | TCR V | TCR AA | TCR atom | dist Å | Hbond salt | VDW C-C | VDW other | MHCa | PEP | MHCb |
|------------|---------|-----------|-------|--------|----------|--------|------------|---------|-----------|------|-----|------|
| A          | 55D     | OD2       | Va    | 94Y    | OH       | 4.25   |            |         | 1         | 1    |     |      |
| A          | 57Q     | CB        | Va    | 94Y    | CE1      | 4.45   |            | 1       |           |      | 1   |      |
| A          | 57Q     | CB        | Va    | 94Y    | CZ       | 4.42   |            | 1       |           |      | 1   |      |
| A          | 57Q     | CB        | Va    | 94Y    | OH       | 3.68   |            |         | 1         |      | 1   |      |
| A          | 57Q     | CD        | Va    | 94Y    | OH       | 4.43   |            |         | 1         |      | 1   |      |
| A          | 57Q     | CD        | Vb    | 55R    | O        | 3.95   |            |         | 1         |      | 1   |      |
| A          | 57Q     | CD        | Vb    | 56N    | CG       | 3.94   |            | 1       |           |      | 1   |      |
| A          | 57Q     | CD        | Vb    | 56N    | ND2      | 4.05   |            |         | 1         |      | 1   |      |
| A          | 57Q     | CD        | Vb    | 56N    | OD1      | 3.94   |            |         | 1         |      | 1   |      |
| A          | 57Q     | CG        | Va    | 94Y    | CE1      | 3.74   |            | 1       |           |      | 1   |      |
| A          | 57Q     | CG        | Va    | 94Y    | CZ       | 3.86   |            | 1       |           |      | 1   |      |
| A          | 57Q     | CG        | Va    | 94Y    | OH       | 3.11   |            |         | 1         |      | 1   |      |
| A          | 57Q     | CG        | Vb    | 56N    | CG       | 3.96   |            | 1       |           |      | 1   |      |
| A          | 57Q     | CG        | Vb    | 56N    | ND2      | 3.62   |            |         | 1         |      | 1   |      |
| A          | 57Q     | CG        | Vb    | 56N    | OD1      | 4.03   |            |         | 1         |      | 1   |      |
| A          | 57Q     | NE2       | Vb    | 55R    | C        | 3.96   |            |         | 1         |      | 1   |      |
| A          | 57Q     | NE2       | Vb    | 55R    | O        | 2.87   | 1          |         |           |      | 1   |      |
| A          | 57Q     | NE2       | Vb    | 56N    | CA       | 4.08   |            |         | 1         |      | 1   |      |
| A          | 57Q     | NE2       | Vb    | 56N    | CB       | 3.95   |            |         | 1         |      | 1   |      |
| A          | 57Q     | NE2       | Vb    | 56N    | CG       | 3.76   |            |         | 1         |      | 1   |      |
| A          | 57Q     | NE2       | Vb    | 56N    | N        | 4.48   |            |         | 1         |      | 1   |      |
| A          | 57Q     | NE2       | Vb    | 56N    | ND2      | 3.93   |            |         | 1         |      | 1   |      |
| A          | 57Q     | NE2       | Vb    | 56N    | OD1      | 4.08   |            |         | 1         |      | 1   |      |
| A          | 57Q     | O         | Va    | 94Y    | CE1      | 4.45   |            |         | 1         |      | 1   |      |
| A          | 57Q     | OE1       | Vb    | 55R    | O        | 4.38   |            |         | 1         |      | 1   |      |
| A          | 57Q     | OE1       | Vb    | 56N    | OD1      | 4.41   |            |         | 1         |      | 1   |      |
| A          | 58F     | CD1       | Va    | 94Y    | CA       | 4.24   |            | 1       |           |      | 1   |      |
| A          | 58F     | CD1       | Va    | 94Y    | CD1      | 3.99   |            | 1       |           |      | 1   |      |
| A          | 58F     | CD1       | Va    | 94Y    | CE1      | 4.14   |            | 1       |           |      | 1   |      |
| A          | 58F     | CD1       | Va    | 94Y    | CG       | 4.26   |            | 1       |           |      | 1   |      |
| A          | 58F     | CE1       | Va    | 92A    | O        | 3.79   |            |         | 1         |      | 1   |      |
| A          | 58F     | CE1       | Va    | 93G    | C        | 3.87   |            | 1       |           |      | 1   |      |
| A          | 58F     | CE1       | Va    | 93G    | CA       | 4.46   |            | 1       |           |      | 1   |      |
| A          | 58F     | CE1       | Va    | 93G    | O        | 4.09   |            |         | 1         |      | 1   |      |
| A          | 58F     | CE1       | Va    | 94Y    | CA       | 3.93   |            | 1       |           |      | 1   |      |
| A          | 58F     | CE1       | Va    | 94Y    | CD1      | 4.13   |            | 1       |           |      | 1   |      |
| A          | 58F     | CE1       | Va    | 94Y    | CD2      | 3.96   |            | 1       |           |      | 1   |      |
| A          | 58F     | CE1       | Va    | 94Y    | CE1      | 4.32   |            | 1       |           |      | 1   |      |
| A          | 58F     | CE1       | Va    | 94Y    | CE2      | 4.14   |            | 1       |           |      | 1   |      |
| A          | 58F     | CE1       | Va    | 94Y    | CG       | 3.98   |            | 1       |           |      | 1   |      |
| A          | 58F     | CE1       | Va    | 94Y    | CZ       | 4.32   |            | 1       |           |      | 1   |      |
| A          | 58F     | CE1       | Va    | 94Y    | N        | 3.80   |            |         | 1         |      | 1   |      |
| A          | 58F     | CE2       | Va    | 93G    | C        | 4.37   |            | 1       |           |      | 1   |      |

|   |     |     |            |      |   |   |   |
|---|-----|-----|------------|------|---|---|---|
| A | 58F | CE2 | Va 93G O   | 4.18 |   | 1 | 1 |
| A | 58F | CZ  | Va 92A C   | 4.37 | 1 |   | 1 |
| A | 58F | CZ  | Va 92A O   | 3.39 |   | 1 | 1 |
| A | 58F | CZ  | Va 93G C   | 3.69 | 1 |   | 1 |
| A | 58F | CZ  | Va 93G CA  | 3.88 | 1 |   | 1 |
| A | 58F | CZ  | Va 93G O   | 3.86 |   | 1 | 1 |
| A | 58F | CZ  | Va 94Y N   | 4.05 |   | 1 | 1 |
| A | 61T | C   | Va 96Q NE2 | 4.33 |   | 1 | 1 |
| A | 61T | C   | Vb 55R NH1 | 4.18 |   | 1 | 1 |
| A | 61T | CA  | Vb 55R CD  | 4.05 | 1 |   | 1 |
| A | 61T | CA  | Vb 55R CG  | 4.36 | 1 |   | 1 |
| A | 61T | CA  | Vb 55R NE  | 4.49 |   | 1 | 1 |
| A | 61T | CA  | Vb 55R NH1 | 4.44 |   | 1 | 1 |
| A | 61T | CB  | Va 96Q NE2 | 4.11 |   | 1 | 1 |
| A | 61T | CG2 | Va 96Q CD  | 3.50 | 1 |   | 1 |
| A | 61T | CG2 | Va 96Q CG  | 3.73 | 1 |   | 1 |
| A | 61T | CG2 | Va 96Q NE2 | 3.46 |   | 1 | 1 |
| A | 61T | CG2 | Va 96Q OE1 | 4.01 |   | 1 | 1 |
| A | 61T | CG2 | Vb 55R CD  | 4.28 | 1 |   | 1 |
| A | 61T | CG2 | Vb 55R CZ  | 3.64 | 1 |   | 1 |
| A | 61T | CG2 | Vb 55R NE  | 3.82 |   | 1 | 1 |
| A | 61T | CG2 | Vb 55R NH1 | 3.66 |   | 1 | 1 |
| A | 61T | CG2 | Vb 55R NH2 | 4.14 |   | 1 | 1 |
| A | 61T | O   | Vb 55R CD  | 3.97 |   | 1 | 1 |
| A | 61T | O   | Vb 55R CZ  | 4.23 |   | 1 | 1 |
| A | 61T | O   | Vb 55R NE  | 4.45 |   | 1 | 1 |
| A | 61T | O   | Vb 55R NH1 | 3.29 | 1 |   | 1 |
| A | 61T | OG1 | Va 94Y CD1 | 3.93 |   | 1 | 1 |
| A | 61T | OG1 | Va 94Y CE1 | 3.77 |   | 1 | 1 |
| A | 62N | CA  | Va 96Q NE2 | 4.21 |   | 1 | 1 |
| A | 62N | CG  | Va 96Q NE2 | 3.97 |   | 1 | 1 |
| A | 62N | N   | Va 96Q NE2 | 4.22 |   | 1 | 1 |
| A | 62N | OD1 | Va 96Q CD  | 4.01 |   | 1 | 1 |
| A | 62N | OD1 | Va 96Q NE2 | 2.93 | 1 |   | 1 |
| A | 62N | OD1 | Va 96Q OE1 | 4.29 |   | 1 | 1 |
| A | 64A | C   | Vb 50F CD2 | 4.47 | 1 |   | 1 |
| A | 64A | C   | Vb 50F CE2 | 4.04 | 1 |   | 1 |
| A | 64A | CB  | Vb 50F CD2 | 4.31 | 1 |   | 1 |
| A | 64A | CB  | Vb 55R CD  | 3.78 | 1 |   | 1 |
| A | 64A | CB  | Vb 55R CG  | 4.42 | 1 |   | 1 |
| A | 64A | CB  | Vb 55R NH1 | 4.48 |   | 1 | 1 |
| A | 64A | O   | Vb 50F CD2 | 4.34 |   | 1 | 1 |
| A | 64A | O   | Vb 50F CE2 | 3.74 |   | 1 | 1 |
| A | 65V | CA  | Vb 50F CE2 | 4.08 | 1 |   | 1 |
| A | 65V | CA  | Vb 50F CZ  | 4.39 | 1 |   | 1 |
| A | 65V | CG2 | Va 96Q OE1 | 3.55 |   | 1 | 1 |
| A | 65V | CG2 | Vb 50F CE2 | 4.43 | 1 |   | 1 |

|   |     |     |    |     |     |      |   |   |   |
|---|-----|-----|----|-----|-----|------|---|---|---|
| A | 65V | CG2 | Vb | 50F | CZ  | 4.25 | 1 | 1 |   |
| A | 65V | CG2 | Vb | 55R | NH1 | 3.63 |   | 1 | 1 |
| A | 65V | N   | Vb | 50F | CE2 | 4.18 |   | 1 | 1 |
| A | 68H | CB  | Vb | 50F | CE2 | 3.88 | 1 |   | 1 |
| A | 68H | CB  | Vb | 50F | CZ  | 4.17 | 1 |   | 1 |
| A | 68H | CB  | Vb | 51S | OG  | 3.71 |   | 1 | 1 |
| A | 68H | CD2 | Vb | 30R | CD  | 4.49 | 1 |   | 1 |
| A | 68H | CD2 | Vb | 50F | CZ  | 4.39 | 1 |   | 1 |
| A | 68H | CE1 | Vb | 30R | CD  | 3.59 | 1 |   | 1 |
| A | 68H | CE1 | Vb | 30R | NE  | 4.23 |   | 1 | 1 |
| A | 68H | CE1 | Vb | 51S | OG  | 4.31 |   | 1 | 1 |
| A | 68H | CG  | Vb | 50F | CE2 | 4.33 | 1 |   | 1 |
| A | 68H | CG  | Vb | 50F | CZ  | 4.20 | 1 |   | 1 |
| A | 68H | CG  | Vb | 51S | OG  | 3.80 |   | 1 | 1 |
| A | 68H | ND1 | Vb | 30R | CD  | 4.40 |   | 1 | 1 |
| A | 68H | ND1 | Vb | 51S | OG  | 3.39 | 1 |   | 1 |
| A | 68H | NE2 | Vb | 30R | CD  | 3.64 |   | 1 | 1 |
| A | 68H | NE2 | Vb | 30R | CZ  | 4.42 |   | 1 | 1 |
| A | 68H | NE2 | Vb | 30R | NE  | 3.80 |   | 1 | 1 |
| B | 60Y | CE2 | Vb | 30R | NH2 | 3.99 |   | 1 | 1 |
| B | 60Y | CZ  | Vb | 30R | NH2 | 3.92 |   | 1 | 1 |
| B | 60Y | OH  | Vb | 28G | O   | 4.12 |   | 1 | 1 |
| B | 60Y | OH  | Vb | 30R | CZ  | 3.71 |   | 1 | 1 |
| B | 60Y | OH  | Vb | 30R | NH1 | 3.61 |   | 1 | 1 |
| B | 60Y | OH  | Vb | 30R | NH2 | 2.93 | 1 |   | 1 |
| B | 64Q | NE2 | Vb | 95A | CB  | 4.06 |   | 1 | 1 |
| B | 64Q | NE2 | Vb | 95A | O   | 4.43 |   | 1 | 1 |
| B | 66E | CD  | Vb | 97N | C   | 4.17 | 1 |   | 1 |
| B | 66E | CD  | Vb | 97N | CA  | 4.15 | 1 |   | 1 |
| B | 66E | CD  | Vb | 97N | CB  | 3.96 | 1 |   | 1 |
| B | 66E | CD  | Vb | 97N | N   | 3.64 |   | 1 | 1 |
| B | 66E | CD  | Vb | 98T | CA  | 4.05 | 1 |   | 1 |
| B | 66E | CD  | Vb | 98T | CB  | 3.61 | 1 |   | 1 |
| B | 66E | CD  | Vb | 98T | N   | 3.28 |   | 1 | 1 |
| B | 66E | CD  | Vb | 98T | OG1 | 3.49 |   | 1 | 1 |
| B | 66E | CG  | Va | 49R | NH2 | 4.07 |   | 1 | 1 |
| B | 66E | CG  | Vb | 97N | CB  | 4.34 | 1 |   | 1 |
| B | 66E | CG  | Vb | 97N | N   | 4.36 |   | 1 | 1 |
| B | 66E | O   | Va | 49R | NH2 | 3.59 |   | 1 | 1 |
| B | 66E | O   | Vb | 97N | OD1 | 3.94 |   | 1 | 1 |
| B | 66E | OE1 | Vb | 96G | C   | 4.25 |   | 1 | 1 |
| B | 66E | OE1 | Vb | 96G | CA  | 4.02 |   | 1 | 1 |
| B | 66E | OE1 | Vb | 96G | N   | 4.07 |   | 1 | 1 |
| B | 66E | OE1 | Vb | 97N | C   | 4.43 |   | 1 | 1 |
| B | 66E | OE1 | Vb | 97N | CA  | 4.40 |   | 1 | 1 |
| B | 66E | OE1 | Vb | 97N | N   | 3.55 |   | 1 | 1 |
| B | 66E | OE1 | Vb | 98T | CA  | 4.27 |   | 1 | 1 |

|   |     |     |            |      |   |   |   |
|---|-----|-----|------------|------|---|---|---|
| B | 66E | OE1 | Vb 98T CB  | 3.91 |   | 1 | 1 |
| B | 66E | OE1 | Vb 98T N   | 3.50 | 1 |   | 1 |
| B | 66E | OE1 | Vb 98T OG1 | 4.22 |   | 1 | 1 |
| B | 66E | OE2 | Va 47L CD1 | 4.18 |   | 1 | 1 |
| B | 66E | OE2 | Vb 97N C   | 3.53 |   | 1 | 1 |
| B | 66E | OE2 | Vb 97N CA  | 3.87 |   | 1 | 1 |
| B | 66E | OE2 | Vb 97N CB  | 3.57 |   | 1 | 1 |
| B | 66E | OE2 | Vb 97N N   | 3.78 |   | 1 | 1 |
| B | 66E | OE2 | Vb 98T C   | 4.36 |   | 1 | 1 |
| B | 66E | OE2 | Vb 98T CA  | 3.11 |   | 1 | 1 |
| B | 66E | OE2 | Vb 98T CB  | 2.64 |   | 1 | 1 |
| B | 66E | OE2 | Vb 98T CG2 | 4.05 |   | 1 | 1 |
| B | 66E | OE2 | Vb 98T N   | 2.55 | 1 |   | 1 |
| B | 66E | OE2 | Vb 98T OG1 | 2.30 | 1 |   | 1 |
| B | 67V | CG2 | Vb 95A O   | 4.37 |   | 1 | 1 |
| B | 69E | C   | Va 49R CZ  | 4.34 | 1 |   | 1 |
| B | 69E | C   | Va 49R NE  | 4.18 |   | 1 | 1 |
| B | 69E | CB  | Va 49R NE  | 4.44 |   | 1 | 1 |
| B | 69E | CD  | Va 49R CD  | 4.21 | 1 |   | 1 |
| B | 69E | CD  | Va 49R CZ  | 3.72 | 1 |   | 1 |
| B | 69E | CD  | Va 49R NE  | 3.14 |   | 1 | 1 |
| B | 69E | CD  | Va 49R NH2 | 3.39 |   | 1 | 1 |
| B | 69E | CG  | Va 49R CD  | 3.93 | 1 |   | 1 |
| B | 69E | CG  | Va 49R CZ  | 3.51 | 1 |   | 1 |
| B | 69E | CG  | Va 49R NE  | 3.00 |   | 1 | 1 |
| B | 69E | CG  | Va 49R NH2 | 3.36 |   | 1 | 1 |
| B | 69E | O   | Va 49R CD  | 4.17 |   | 1 | 1 |
| B | 69E | O   | Va 49R NE  | 4.16 |   | 1 | 1 |
| B | 69E | OE1 | Va 49R CZ  | 4.27 |   | 1 | 1 |
| B | 69E | OE1 | Va 49R NE  | 4.02 |   | 1 | 1 |
| B | 69E | OE1 | Va 49R NH2 | 3.54 |   | 1 | 1 |
| B | 69E | OE2 | Va 47L CD2 | 4.35 |   | 1 | 1 |
| B | 69E | OE2 | Va 49R CD  | 3.75 |   | 1 | 1 |
| B | 69E | OE2 | Va 49R CG  | 4.13 |   | 1 | 1 |
| B | 69E | OE2 | Va 49R CZ  | 3.90 |   | 1 | 1 |
| B | 69E | OE2 | Va 49R NE  | 2.99 | 1 |   | 1 |
| B | 69E | OE2 | Va 49R NH2 | 3.90 | 1 |   | 1 |
| B | 70R | CA  | Va 49R CZ  | 3.80 | 1 |   | 1 |
| B | 70R | CA  | Va 49R NE  | 4.29 |   | 1 | 1 |
| B | 70R | CA  | Va 49R NH1 | 3.70 |   | 1 | 1 |
| B | 70R | CA  | Va 49R NH2 | 4.06 |   | 1 | 1 |
| B | 70R | CA  | Vb 97N OD1 | 4.19 |   | 1 | 1 |
| B | 70R | CB  | Va 49R CZ  | 4.16 | 1 |   | 1 |
| B | 70R | CB  | Va 49R NH1 | 3.88 |   | 1 | 1 |
| B | 70R | CB  | Va 49R NH2 | 4.11 |   | 1 | 1 |
| B | 70R | CB  | Vb 97N CG  | 4.37 | 1 |   | 1 |
| B | 70R | CB  | Vb 97N OD1 | 3.47 |   | 1 | 1 |

|   |     |     |            |      |   |   |   |
|---|-----|-----|------------|------|---|---|---|
| B | 70R | CD  | Va 95N C   | 4.36 | 1 |   | 1 |
| B | 70R | CD  | Va 95N CB  | 4.27 | 1 |   | 1 |
| B | 70R | CD  | Va 95N CG  | 3.56 | 1 |   | 1 |
| B | 70R | CD  | Va 95N ND2 | 3.68 |   | 1 | 1 |
| B | 70R | CD  | Va 95N O   | 3.24 |   | 1 | 1 |
| B | 70R | CD  | Va 95N OD1 | 3.57 |   | 1 | 1 |
| B | 70R | CD  | Vb 97N CG  | 4.10 | 1 |   | 1 |
| B | 70R | CD  | Vb 97N ND2 | 3.64 |   | 1 | 1 |
| B | 70R | CD  | Vb 97N OD1 | 3.90 |   | 1 | 1 |
| B | 70R | CG  | Va 49R NH1 | 4.09 |   | 1 | 1 |
| B | 70R | CG  | Va 95N CG  | 3.79 | 1 |   | 1 |
| B | 70R | CG  | Va 95N ND2 | 3.84 |   | 1 | 1 |
| B | 70R | CG  | Va 95N OD1 | 3.41 |   | 1 | 1 |
| B | 70R | CG  | Vb 97N CG  | 4.37 | 1 |   | 1 |
| B | 70R | CG  | Vb 97N ND2 | 4.19 |   | 1 | 1 |
| B | 70R | CG  | Vb 97N OD1 | 3.79 |   | 1 | 1 |
| B | 70R | CZ  | Va 95N O   | 3.84 |   | 1 | 1 |
| B | 70R | N   | Va 49R CZ  | 3.91 |   | 1 | 1 |
| B | 70R | N   | Va 49R NE  | 4.16 |   | 1 | 1 |
| B | 70R | N   | Va 49R NH1 | 4.29 |   | 1 | 1 |
| B | 70R | N   | Va 49R NH2 | 3.92 |   | 1 | 1 |
| B | 70R | NE  | Va 95N O   | 3.88 |   | 1 | 1 |
| B | 70R | NH1 | Va 95N C   | 4.17 |   | 1 | 1 |
| B | 70R | NH1 | Va 95N O   | 3.02 | 1 |   | 1 |
| B | 70R | NH1 | Va 96Q CA  | 4.30 |   | 1 | 1 |
| B | 70R | NH1 | Va 96Q CB  | 3.93 |   | 1 | 1 |
| B | 70R | NH1 | Vb 96G C   | 3.82 |   | 1 | 1 |
| B | 70R | NH1 | Vb 96G CA  | 3.86 |   | 1 | 1 |
| B | 70R | NH1 | Vb 96G O   | 3.84 |   | 1 | 1 |
| B | 70R | NH1 | Vb 97N ND2 | 4.38 |   | 1 | 1 |
| B | 73A | CA  | Va 51N ND2 | 3.97 |   | 1 | 1 |
| B | 73A | CB  | Va 49R CD  | 3.96 | 1 |   | 1 |
| B | 73A | CB  | Va 51N CG  | 4.12 | 1 |   | 1 |
| B | 73A | CB  | Va 51N ND2 | 3.73 |   | 1 | 1 |
| B | 73A | CB  | Va 51N OD1 | 3.93 |   | 1 | 1 |
| B | 73A | O   | Va 51N ND2 | 4.19 |   | 1 | 1 |
| B | 74E | CG  | Va 95N OD1 | 4.43 |   | 1 | 1 |
| B | 74E | OE2 | Va 95N OD1 | 4.43 |   | 1 | 1 |
| B | 76D | CB  | Va 51N CB  | 3.67 | 1 |   | 1 |
| B | 76D | CB  | Va 51N CG  | 4.17 | 1 |   | 1 |
| B | 76D | CB  | Va 51N ND2 | 3.84 |   | 1 | 1 |
| B | 76D | CG  | Va 51N CB  | 4.15 | 1 |   | 1 |
| B | 76D | CG  | Va 51N ND2 | 3.92 |   | 1 | 1 |
| B | 76D | OD2 | Va 51N CB  | 3.80 |   | 1 | 1 |
| B | 76D | OD2 | Va 51N CG  | 3.95 |   | 1 | 1 |
| B | 76D | OD2 | Va 51N ND2 | 3.14 | 1 |   | 1 |
| B | 77T | C   | Va 29N ND2 | 4.03 |   | 1 | 1 |

|   |      |     |            |      |   |   |   |
|---|------|-----|------------|------|---|---|---|
| B | 77T  | CA  | Va 29N ND2 | 4.26 |   | 1 | 1 |
| B | 77T  | CA  | Va 50S OG  | 4.11 |   | 1 | 1 |
| B | 77T  | CB  | Va 29N CG  | 4.35 | 1 |   | 1 |
| B | 77T  | CB  | Va 29N ND2 | 3.23 |   | 1 | 1 |
| B | 77T  | CB  | Va 50S OG  | 3.49 |   | 1 | 1 |
| B | 77T  | CG2 | Va 29N ND2 | 4.29 |   | 1 | 1 |
| B | 77T  | CG2 | Va 29N O   | 4.41 |   | 1 | 1 |
| B | 77T  | CG2 | Va 50S CB  | 4.40 | 1 |   | 1 |
| B | 77T  | CG2 | Va 50S N   | 4.42 |   | 1 | 1 |
| B | 77T  | CG2 | Va 50S OG  | 3.14 |   | 1 | 1 |
| B | 77T  | CG2 | Va 51N CB  | 4.35 | 1 |   | 1 |
| B | 77T  | CG2 | Va 51N CG  | 4.32 | 1 |   | 1 |
| B | 77T  | CG2 | Va 51N N   | 4.10 |   | 1 | 1 |
| B | 77T  | CG2 | Va 51N OD1 | 4.34 |   | 1 | 1 |
| B | 77T  | O   | Va 29N ND2 | 3.83 |   | 1 | 1 |
| B | 77T  | OG1 | Va 29N CB  | 4.41 |   | 1 | 1 |
| B | 77T  | OG1 | Va 29N CG  | 4.03 |   | 1 | 1 |
| B | 77T  | OG1 | Va 29N ND2 | 2.87 | 1 |   | 1 |
| B | 78V  | CG2 | Va 29N ND2 | 3.70 |   | 1 | 1 |
| B | 81H  | CE1 | Va 27S CB  | 3.88 | 1 |   | 1 |
| B | 81H  | CE1 | Va 27S OG  | 3.44 |   | 1 | 1 |
| B | 81H  | NE2 | Va 27S CB  | 4.24 |   | 1 | 1 |
| B | 81H  | NE2 | Va 29N ND2 | 3.90 |   | 1 | 1 |
| P | 199V | CA  | Va 29N ND2 | 4.47 |   | 1 | 1 |
| P | 199V | CG1 | Va 29N ND2 | 3.46 |   | 1 | 1 |
| P | -1E  | CA  | Va 29N ND2 | 4.43 |   | 1 | 1 |
| P | -1E  | CB  | Va 27S CB  | 4.50 | 1 |   | 1 |
| P | -1E  | CB  | Va 27S OG  | 4.33 |   | 1 | 1 |
| P | -1E  | CD  | Va 26T C   | 4.20 | 1 |   | 1 |
| P | -1E  | CD  | Va 26T CA  | 4.16 | 1 |   | 1 |
| P | -1E  | CD  | Va 26T CB  | 4.33 | 1 |   | 1 |
| P | -1E  | CD  | Va 27S CA  | 4.32 | 1 |   | 1 |
| P | -1E  | CD  | Va 27S CB  | 4.05 | 1 |   | 1 |
| P | -1E  | CD  | Va 27S N   | 3.39 |   | 1 | 1 |
| P | -1E  | CD  | Va 27S OG  | 3.79 |   | 1 | 1 |
| P | -1E  | N   | Va 29N ND2 | 3.74 |   | 1 | 1 |
| P | -1E  | O   | Va 27S CB  | 4.16 |   | 1 | 1 |
| P | -1E  | O   | Va 27S OG  | 3.77 |   | 1 | 1 |
| P | -1E  | OE1 | Va 26T C   | 3.47 |   | 1 | 1 |
| P | -1E  | OE1 | Va 26T CA  | 3.28 |   | 1 | 1 |
| P | -1E  | OE1 | Va 26T CB  | 3.15 |   | 1 | 1 |
| P | -1E  | OE1 | Va 26T CG2 | 4.09 |   | 1 | 1 |
| P | -1E  | OE1 | Va 26T OG1 | 4.12 |   | 1 | 1 |
| P | -1E  | OE1 | Va 27S CA  | 3.92 |   | 1 | 1 |
| P | -1E  | OE1 | Va 27S CB  | 4.01 |   | 1 | 1 |
| P | -1E  | OE1 | Va 27S N   | 2.81 | 1 |   | 1 |
| P | -1E  | OE1 | Va 27S O   | 4.30 |   | 1 | 1 |

|   |     |     |            |      |   |   |   |
|---|-----|-----|------------|------|---|---|---|
| P | -1E | OE1 | Va 27S OG  | 4.17 |   | 1 | 1 |
| P | -1E | OE2 | Va 26T C   | 4.13 |   | 1 | 1 |
| P | -1E | OE2 | Va 26T CA  | 4.24 |   | 1 | 1 |
| P | -1E | OE2 | Va 27S CA  | 4.28 |   | 1 | 1 |
| P | -1E | OE2 | Va 27S CB  | 4.00 |   | 1 | 1 |
| P | -1E | OE2 | Va 27S N   | 3.40 | 1 |   | 1 |
| P | -1E | OE2 | Va 27S OG  | 3.33 | 1 |   | 1 |
| P | 2L  | CD1 | Va 27S CB  | 4.35 |   | 1 | 1 |
| P | 2L  | CD1 | Va 28I C   | 4.45 |   | 1 | 1 |
| P | 2L  | CD1 | Va 28I O   | 3.98 |   | 1 | 1 |
| P | 2L  | CD1 | Va 29N ND2 | 4.15 |   | 1 | 1 |
| P | 2L  | CD1 | Va 29N OD1 | 4.39 |   | 1 | 1 |
| P | 2L  | CD2 | Va 27S CB  | 4.34 |   | 1 | 1 |
| P | 2L  | CD2 | Va 29N OD1 | 4.32 |   | 1 | 1 |
| P | 2L  | CD2 | Va 93G C   | 4.39 |   | 1 | 1 |
| P | 2L  | CD2 | Va 93G CA  | 3.60 |   | 1 | 1 |
| P | 2L  | CD2 | Va 93G O   | 4.13 |   | 1 | 1 |
| P | 3Y  | CD1 | Va 93G O   | 3.87 |   | 1 | 1 |
| P | 3Y  | CE1 | Va 93G C   | 4.31 |   | 1 | 1 |
| P | 3Y  | CE1 | Va 93G O   | 3.36 |   | 1 | 1 |
| P | 3Y  | CE1 | Va 94Y C   | 3.98 |   | 1 | 1 |
| P | 3Y  | CE1 | Va 94Y CA  | 4.04 |   | 1 | 1 |
| P | 3Y  | CE1 | Va 94Y O   | 3.43 |   | 1 | 1 |
| P | 3Y  | CE2 | Va 94Y O   | 4.43 |   | 1 | 1 |
| P | 3Y  | CE2 | Va 96Q NE2 | 3.84 |   | 1 | 1 |
| P | 3Y  | CZ  | Va 93G O   | 4.44 |   | 1 | 1 |
| P | 3Y  | CZ  | Va 94Y C   | 4.16 |   | 1 | 1 |
| P | 3Y  | CZ  | Va 94Y CA  | 4.44 |   | 1 | 1 |
| P | 3Y  | CZ  | Va 94Y O   | 3.28 |   | 1 | 1 |
| P | 3Y  | CZ  | Va 96Q NE2 | 3.85 |   | 1 | 1 |
| P | 3Y  | OH  | Va 94Y C   | 3.51 |   | 1 | 1 |
| P | 3Y  | OH  | Va 94Y CA  | 3.83 |   | 1 | 1 |
| P | 3Y  | OH  | Va 94Y O   | 2.55 | 1 |   | 1 |
| P | 3Y  | OH  | Va 96Q CD  | 3.83 |   | 1 | 1 |
| P | 3Y  | OH  | Va 96Q CG  | 3.68 |   | 1 | 1 |
| P | 3Y  | OH  | Va 96Q NE2 | 2.99 | 1 |   | 1 |
| P | 5V  | CA  | Va 96Q NE2 | 4.36 |   | 1 | 1 |
| P | 5V  | CB  | Va 96Q CD  | 4.32 |   | 1 | 1 |
| P | 5V  | CB  | Va 96Q NE2 | 4.05 |   | 1 | 1 |
| P | 5V  | CG1 | Va 96Q CB  | 4.03 |   | 1 | 1 |
| P | 5V  | CG1 | Va 96Q CD  | 3.40 |   | 1 | 1 |
| P | 5V  | CG1 | Va 96Q CG  | 4.06 |   | 1 | 1 |
| P | 5V  | CG1 | Va 96Q NE2 | 3.46 |   | 1 | 1 |
| P | 5V  | CG1 | Va 96Q OE1 | 3.51 |   | 1 | 1 |
| P | 5V  | CG2 | Va 94Y O   | 3.66 |   | 1 | 1 |
| P | 5V  | CG2 | Va 95N C   | 4.17 |   | 1 | 1 |
| P | 5V  | CG2 | Va 95N CB  | 3.80 |   | 1 | 1 |

|   |     |     |            |      |   |   |   |
|---|-----|-----|------------|------|---|---|---|
| P | 5V  | CG2 | Va 95N O   | 3.84 |   | 1 | 1 |
| P | 5V  | CG2 | Va 96Q CB  | 4.35 | 1 |   | 1 |
| P | 5V  | CG2 | Va 96Q CD  | 4.09 | 1 |   | 1 |
| P | 5V  | CG2 | Va 96Q CG  | 4.13 | 1 |   | 1 |
| P | 5V  | CG2 | Va 96Q NE2 | 3.77 |   | 1 | 1 |
| P | 6A  | O   | Va 96Q OE1 | 4.42 |   | 1 | 1 |
| P | 8E  | CB  | Vb 30R CZ  | 4.22 | 1 |   | 1 |
| P | 8E  | CB  | Vb 30R NE  | 4.04 |   | 1 | 1 |
| P | 8E  | CB  | Vb 30R NH2 | 3.67 |   | 1 | 1 |
| P | 8E  | CD  | Vb 30R CZ  | 4.44 | 1 |   | 1 |
| P | 8E  | CD  | Vb 30R NE  | 3.94 |   | 1 | 1 |
| P | 8E  | CD  | Vb 30R NH2 | 3.97 |   | 1 | 1 |
| P | 8E  | CD  | Vb 50F CE1 | 3.67 | 1 |   | 1 |
| P | 8E  | CD  | Vb 50F CZ  | 4.14 | 1 |   | 1 |
| P | 8E  | CD  | Vb 95A O   | 4.36 |   | 1 | 1 |
| P | 8E  | CG  | Vb 30R NE  | 4.40 |   | 1 | 1 |
| P | 8E  | CG  | Vb 30R NH2 | 4.40 |   | 1 | 1 |
| P | 8E  | CG  | Vb 50F CE1 | 4.12 | 1 |   | 1 |
| P | 8E  | CG  | Vb 50F CZ  | 4.09 | 1 |   | 1 |
| P | 8E  | O   | Vb 30R NH2 | 4.19 |   | 1 | 1 |
| P | 8E  | OE1 | Vb 30R CB  | 4.19 |   | 1 | 1 |
| P | 8E  | OE1 | Vb 30R CD  | 4.06 |   | 1 | 1 |
| P | 8E  | OE1 | Vb 30R CG  | 4.49 |   | 1 | 1 |
| P | 8E  | OE1 | Vb 30R CZ  | 3.30 |   | 1 | 1 |
| P | 8E  | OE1 | Vb 30R NE  | 2.89 | 1 |   | 1 |
| P | 8E  | OE1 | Vb 30R NH2 | 2.89 | 1 |   | 1 |
| P | 8E  | OE1 | Vb 50F CE1 | 3.94 |   | 1 | 1 |
| P | 8E  | OE1 | Vb 95A O   | 4.34 |   | 1 | 1 |
| P | 8E  | OE2 | Vb 31S OG  | 4.49 |   | 1 | 1 |
| P | 8E  | OE2 | Vb 50F CD1 | 4.49 |   | 1 | 1 |
| P | 8E  | OE2 | Vb 50F CE1 | 3.67 |   | 1 | 1 |
| P | 8E  | OE2 | Vb 50F CZ  | 4.38 |   | 1 | 1 |
| P | 8E  | OE2 | Vb 95A O   | 4.09 |   | 1 | 1 |
| P | 9E  | C   | Vb 30R CZ  | 4.44 | 1 |   | 1 |
| P | 9E  | C   | Vb 30R NH2 | 4.45 |   | 1 | 1 |
| P | 9E  | O   | Vb 30R CD  | 4.40 |   | 1 | 1 |
| P | 9E  | O   | Vb 30R CZ  | 3.46 |   | 1 | 1 |
| P | 9E  | O   | Vb 30R NE  | 3.72 |   | 1 | 1 |
| P | 9E  | O   | Vb 30R NH1 | 3.70 |   | 1 | 1 |
| P | 9E  | O   | Vb 30R NH2 | 3.69 |   | 1 | 1 |
| P | 10G | C   | Vb 30R NH1 | 3.72 |   | 1 | 1 |
| P | 10G | CA  | Vb 30R CZ  | 4.20 | 1 |   | 1 |
| P | 10G | CA  | Vb 30R NH1 | 3.65 |   | 1 | 1 |
| P | 10G | CA  | Vb 30R NH2 | 4.32 |   | 1 | 1 |
| P | 10G | O   | Vb 30R NH1 | 3.64 |   | 1 | 1 |
| P | 11C | N   | Vb 30R NH1 | 4.47 |   | 1 | 1 |
| P | 11C | O   | Vb 30R CD  | 4.03 |   | 1 | 1 |



|   |     |   |    |     |     |      |    |     |     |     |     |     |
|---|-----|---|----|-----|-----|------|----|-----|-----|-----|-----|-----|
| P | 11C | O | Vb | 30R | NH1 | 3.93 | 1  | 1   |     |     |     |     |
|   |     |   |    |     |     |      | 20 | 108 | 245 | 109 | 119 | 145 |
|   |     |   |    |     |     |      |    |     | 373 |     |     | 373 |
